# Supplementary material
Source: PubMed Central journal article supplement (PMC5533231)
Supplement: ASN.2016080892SupplementaryData.pdf [file ASN.2016080892SupplementaryData.pdf]

***NFAT5 and SLC4A10 Loci Associate with Plasma Osmolality***

Carsten A. Böger 1\*, Mathias Gorski 1,2\*, Gearoid M. McMahon 3, Huichun Xu 4, Yen-Pei C. Chang 4, Peter J. van der Most 5, Gerjan Navis 6, I. M. Nolte 5, Martin H. de Borst 6, Weihua Zhang 7, Benjamin Lehne 7, Marie Loh 7,8, Sian-Tsung Tan 9, Eric Boerwinkle 10, Morgan E. Grams 11, Peggy Sekula 12, Man Li 13, Beth Wilmot 14, James G. Moon 14, Paul Scheet 15, Francesco Cucca 16, Xiangjun Xiao 17, Leo-Pekka Lyytikäinen 18, Graciela Delgado 19, Tanja B Grammer 20, Marcus E Kleber 19, Sanaz Sedaghat 21, Fernando Rivadeneira 22, Tanguy Corre 23,24,25, Zoltan Kutalik 23,24, Sven Bergmann 24,25, Carrie M. Nielson 26, Priya Srikanth 26, Alexander Teumer 27,28, Martina Müller-Nurasyid 29,30,31, Anne Catharina Brockhaus 30,31, Arne Pfeufer 32, Wolfgang Rathmann 33, Annette Peters 34, Martha Matsumoto 35, Mariza de Andrade 35, Elizabeth J. Atkinson 35, Cassianne Robinson-Cohen 36, Ian H. de Boer 36, Shih-Jen Hwang 37,38, Iris M. Heid 2, Martin Gögele 39, Maria Pina Concas 40, Toshiko Tanaka 41, Stefania Bandinelli 42, Mike A. Nalls 43, Andrew Singleton 44, Salman M. Tajuddin 45, Adebawale Adeyemo 46, Jie Zhou 46, Ayo Doumatey 46, Shannon McWeeney 14, Joanne Murabito 47, Nora Franceschini 48, Michael Flessner 49, Michael Shlipak 50, James G. Wilson 51, Guanjie Chen 46, Charles N. Rotimi 46, Alan B. Zonderman 52, Michele K. Evans 45, Luigi Ferrucci 41, Olivier Devuyst 53, Mario Pirastu 40, Alan Shuldiner 4, Andrew A. Hicks 39, Peter Paul Pramstaller 39, Bryan Kestenbaum 36, Sharon L.R. Kardis 54, Stephen T. Turner 55, LifeLines Cohort Study<sup>§</sup>, Tamara Ellefson Briske 35, Christian Gieger 30, Konstantin Strauch 30,56 Christa Meisinger 34, Thomas Meitinger 57, Uwe Völker 28,58, Matthias Nauck 28,59, Henry Völzke 27,28,60, Peter Vollenweider 61, Murielle Bochud 23, Gerard Waeber 61, Mika Kähönen 62, Terho Lehtimäki 18, Winfried März 63, Abbas Dehghan 21, Oscar H. Franco 21, Andre G. Uitterlinden

22, Albert Hofman 21, Herman A. Taylor 64, John C. Chambers 7, Jaspal S. Kooner 9, Caroline S. Fox 65, Robert Hitzemann 66, Eric S. Orwoll 67, Cristian Pattaro 39, David Schlessinger 68, Anna Köttgen 69, Harold Snieder 5, Afshin Parsa 4\*\*, David M. Cohen 70\*\*#

\* These authors contributed equally to this study.

\*\* These authors jointly oversaw this work.

# Corresponding author

**The views expressed in this manuscript are those of the authors and do not necessarily represent the views of the National Heart, Lung, and Blood Institute; the National Institutes of Health; or the U.S. Department of Health and Human Services.**

#### **§ LifeLines Cohort Study**

Behrooz Z. Alizadeh (1), H Marika Boezen (1), Lude Franke (2), Pim van der Harst (3), Gerjan Navis (4), Marianne G. Rots (5), Harold Snieder (1), Morris Swertz (2), Bruce HR Wolffenbuttel (6), Cisca Wijmenga (2)

(1) *Department of Epidemiology, University of Groningen, University Medical Center Groningen, The Netherlands*

(2) *Department of Genetics, University of Groningen, University Medical Center Groningen, The Netherlands*

(3) *Department of Cardiology, University of Groningen, University Medical Center Groningen, The Netherlands*

(4) *Department of Internal Medicine, Division of Nephrology, University of Groningen, University Medical Center Groningen, The Netherlands*

(5) *Department of Pathology and Medical Biology, University of Groningen, University Medical Center Groningen, The Netherlands*

(6) *Department of Endocrinology, University of Groningen, University Medical Center Groningen,  
The Netherlands*

**Author contributions:**

CAB, MG, AP, and DMC were responsible for experimental design; all authors provided cohort-level data, and performed cohort-level GWAS with data analysis and interpretation; CAB and MG performed GWAS meta-analysis; CAB, MG, GM, AP, and DMC interpreted GWAS meta-analysis; DMC and HX performed bioinformatic analysis; DMC and CAB drafted the manuscript; all authors critiqued and revised the manuscript; CAB, MG, GM, AP, and DMC consolidated the revisions; DMC conceived the project.

## AFFILIATIONS

- 1 Department of Nephrology, University Hospital Regensburg, Germany.
- 2 Department of Genetic Epidemiology, University of Regensburg, Regensburg, Germany
- 3 Division of Renal Medicine, Department of Medicine, Brigham and Women's Hospital,  
Boston, MA, USA
- 4 Department of Medicine, University of Maryland, Baltimore, MD, USA
- 5 Department of Epidemiology, University of Groningen, University Medical Center Groningen,  
Groningen, The Netherlands
- 6 Department of Internal Medicine, Division of Nephrology, University of Groningen, University  
Medical Center Groningen, Groningen, The Netherlands
- 7 Department of Epidemiology and Biostatistics, Imperial College London, London W2 1PG, UK
- 8 Translational Laboratory in Genetic Medicine, Agency for Science, Technology and Research  
(A\*STAR), Singapore
- 9 National Heart and Lung Institute, Imperial College London, London W12 0NN, UK
- 10 Human Genetics Center and Dept. of Epidemiology, UTHealth School of Public Health,  
University of Texas Health Science Center at Houston, Houston, TX, USA
- 11 Division of Nephrology, Johns Hopkins University School of Medicine, Baltimore, MD, USA
- 12 Division of Genetic Epidemiology, Institute for Medical Biometry and Statistics, Faculty of  
Medicine and Medical Center - University of Freiburg, Germany
- 13 Dept. of Epidemiology, Johns Hopkins Bloomberg School of Public Health, Baltimore, MD,  
USA
- 14 Department of Medical Informatics and Clinical Epidemiology, Oregon Clinical and  
Translational Research Institute, Oregon Health & Science University, Portland, OR, USA
- 15 Dept. of Epidemiology, The University of Texas MD Anderson Cancer Center, Houston, TX,  
USA

- 16 Institute of Genetic and Biomedical Research IRGB, Italian National Research Council , Rome, Italy
- 17 Department of Biomedical Data Science, Geisel School of Medicine at Dartmouth, Hanover, NH
- 18 Department of Clinical Chemistry, Fimlab Laboratories and Faculty of Medicine and Life Sciences, University of Tampere, Tampere 33520, Finland
- 19 Vth Department of Medicine, Medical Faculty Mannheim, Heidelberg University, Heidelberg, Germany
- 20 Mannheim Institute of Public Health, Social and Preventive Medicine, Medical Faculty Mannheim, Heidelberg University, Heidelberg, Germany
- 21 Department of Epidemiology, Erasmus Medical Center, Rotterdam, The Netherlands
- 22 Department of Internal Medicine, Erasmus Medical Center, Rotterdam, The Netherlands
- 23 Institute of Social and Preventive Medicine, Lausanne University Hospital (CHUV), Lausanne, Switzerland
- 24 Swiss Institute of Bioinformatics, Lausanne, Switzerland
- 25 Faculty of Biology and Medicine, University of Lausanne, Lausanne, Switzerland
- 26 School of Public Health, Oregon Health & Science University, Portland, OR, USA
- 27 Institute for Community Medicine, University Medicine Greifswald, Germany
- 28 DZHK (German Centre for Cardiovascular Research), partner site Greifswald, Germany
- 29 DZHK (German Centre for Cardiovascular Research), partner site Munich Heart Alliance, Munich, Germany
- 30 Institute of Genetic Epidemiology, Helmholtz Zentrum München - German Research Center for Environmental Health, Neuherberg, Germany
- 31 Department of Medicine I, University Hospital Grosshadern, Ludwig-Maximilians-Universität, Munich, Germany.

- 32 Institute of Bioinformatics and Systems Biology, German Research Center for Environmental Health, HemholtzZentrum, Munich, Germany
- 33 Institute of Biometrics and Epidemiology, German Diabetes Center, Leibniz Center for Diabetes Research at Heinrich Heine University Düsseldorf, Düsseldorf, Germany
- 34 Institute of Epidemiology II, Helmholtz Zentrum München - German Research Center for Environmental Health, Neuherberg, Germany.
- 35 Division of Biomedical Statistics and Informatics, Department of Health Sciences Research, Mayo Clinic, Rochester, MN, USA
- 36 Kidney Research Institute, Division of Nephrology, University of Washington, Seattle, WA, USA
- 37 Boston University School of Public Health, Boston, MA, and National Heart, Lung, and Blood Institute, Bethesda, MD, USA
- 38 Population Sciences Branch, Division of Intramural Research, NHLBI, NIH, Bethesda MD, USA
- 39 Center for Biomedicine, European Academy of Bozen/Bolzano (EURAC), affiliated to the University of Lübeck, Via Galvani 31, 39100 Bolzano, Italy
- 40 Institute of Population Genetics, National Research Council, Sassari, Italy
- 41 Translational Gerontology Branch, National Institute on Aging, Baltimore MD, USA
- 42 Geriatric Unit, Azienda USL, Toscana centro, Florence, Italy
- 43 Laboratory of Neurogenetics, National Institute on Aging, National Institutes of Health, Bethesda, MD, USA
- 44 Laboratory of Neurogenetics, Molecular Genetics Section, National Institute on Aging, Bethesda, MD, USA
- 45 Health Disparities Research Section, Laboratory of Epidemiology and Population Sciences, National Institute on Aging, National Institutes of Health, Baltimore, MD, USA
- 46 Center for Research on Genomics and Global Health, National Institutes of Health, Bethesda, MD, USA

- 47 Department of Medicine, Boston University School of Medicine, Boston, MA, USA and Framingham Heart Study
- 48 Department of Epidemiology, Gillings School of Global Public Health, University of North Carolina, Chapel Hill, NC, 27514 USA
- 49 National Institute of Diabetes, Digestive, and Kidney Disease, National Institutes of Health, Bethesda, MD, USA
- 50 Department of Medicine and the Kidney Health Research Collaborative, University of California, San Francisco School of Medicine, and the Division of General Internal Medicine, San Francisco VA Medical Center, San Francisco, CA, USA
- 51 Department of Physiology and Biophysics, University of Mississippi Medical Center, Jackson, MI, USA
- 52 Laboratory of Epidemiology and Population Sciences, National Institute on Aging, National Institutes of Health, Bethesda, MD, USA
- 53 University of Zürich Institute of Physiology, Zürich Center for Integrative Human Physiology, Zürich, Switzerland
- 54 Public Health Genetics Program and Department of Epidemiology, School of Public Health, University of Michigan, Ann Arbor, Michigan, USA
- 55 Department of Medicine, Mayo Clinic, Rochester, MN, USA
- 56 Institute of Medical Informatics, Biometry and Epidemiology, Chair of Genetic Epidemiology, Ludwig-Maximilians-Universität, Munich, Germany
- 57 Institute of Human Genetics, Helmholtz Zentrum München – German Research Center for Environmental Health, Neuherberg, Germany.
- 58 Interfaculty Institute for Genetics and Functional Genomics, University Medicine Greifswald, Germany
- 59 Institute of Clinical Chemistry and Laboratory Medicine, University Medicine Greifswald, Germany

- 60 German Center for Diabetes Research (DZD), Site Greifswald, Germany
- 61 Service of Internal Medicine, Lausanne University Hospital (CHUV), Lausanne, Switzerland
- 62 Department of Clinical Physiology, Tampere University Hospital and Faculty of Medicine and Life Sciences, University of Tampere, Tampere 33521, Finland
- 63 Synlab Academy, Synlab Services GmbH, Germany
- 64 Cardiovascular Research Institute, Morehouse School of Medicine, Atlanta, GA, USA
- 65 Genetics and Pharmacogenomics, Merck Research Labs, Kenilworth, NJ and National Heart, Lung, and Blood Institute, Bethesda, MD, USA
- 66 Department of Behavioral Neuroscience, Oregon Health & Science University, Portland, OR, USA
- 67 Bone & Mineral Unit, Oregon Health & Science University, Portland, OR, USA
- 68 Laboratory of Genetics, Human Genetics Section, National Institute on Aging, Bethesda, MD, USA
- 69 Divisions of Genetic Epidemiology and Nephrology, Medical Center - University of Freiburg, Faculty of Medicine, University of Freiburg, Germany; Dept. of Epidemiology, Johns Hopkins Bloomberg School of Public Health, Baltimore, MD, USA
- 70 Division of Nephrology & Hypertension, Department of Medicine, Oregon Health & Science University, Portland, OR, and the VA Portland Health Care System, Portland, OR, USA



**Supplementary Table 1: Number of individuals excluded due to low eGFR<sub>crea</sub> or high glucose.**

| <b>Study</b>                                  | <b>Sample Size</b> | <b>plasma glucose &gt; 150 mg/dl, n</b> | <b>eGFR &lt; mean eGFR<sub>crea</sub> - 2 SD of eGFR<sub>crea</sub>, n</b> |
|-----------------------------------------------|--------------------|-----------------------------------------|----------------------------------------------------------------------------|
| <b>Stage 1 discovery (European descent)</b>   |                    |                                         |                                                                            |
| Amish studies                                 | 1,131              | 0                                       | 18                                                                         |
| BLSA                                          | 594                | 0                                       | 0                                                                          |
| ARIC: Europeans                               | 8,535              | 0                                       | 7                                                                          |
| FHS                                           | 2,494              | 0                                       | 18                                                                         |
| COLAUS                                        | 2,816              | 98                                      | 47                                                                         |
| MrOS                                          | 3,909              | 0                                       | 34                                                                         |
| MICROS                                        | 1,146              | 0                                       | 6                                                                          |
| KORA F3                                       | 1,425              | 138                                     | 44                                                                         |
| KORA F4                                       | 1,671              | 66                                      | 39                                                                         |
| GENOA: Europeans                              | 1,064              | 428                                     | 445                                                                        |
| InCHIANTI                                     | 1,142              | 48                                      | 16                                                                         |
| LOLIPOP_EW610                                 | 881                | 0                                       | 11                                                                         |
| LOLIPOP_EWA                                   | 546                | 0                                       | 4                                                                          |
| LOLIPOP_EWP                                   | 574                | 0                                       | 9                                                                          |
| LURIC                                         | 2,579              | 327                                     | 84                                                                         |
| Ogliastra Genetic Park Talana study           | 691                | 18                                      | 18                                                                         |
| Ogliastra Genetic Park study                  | 382                | 18                                      | 6                                                                          |
| SHIP                                          | 3,767              | 201                                     | 88                                                                         |
| SHIP-TREND                                    | 979                | 1                                       | 6                                                                          |
| Rotterdam                                     | 3,415              | 0                                       | NA                                                                         |
| SARDINIA                                      | 6,148              | 0                                       | 118                                                                        |
| <b>Stage 2 Replication (European descent)</b> |                    |                                         |                                                                            |
| DIACORE                                       | 1,151              | 364                                     | 25                                                                         |
| FINCAVAS                                      | 1,761              | 220                                     | 63                                                                         |
| LifeLines                                     | 12,270             | 137                                     | 148                                                                        |
| MESA                                          | 2,455              | 43                                      | 53                                                                         |
| <b>Indian</b>                                 |                    |                                         |                                                                            |
| LOLIPOP_IA610                                 | 5,654              | 0                                       | 109                                                                        |
| LOLIPOP_IA317                                 | 1,886              | 0                                       | 34                                                                         |
| LOLIPOP_IAOmniEE                              | 802                | 0                                       | 6                                                                          |
| LOLIPOP_IAP                                   | 423                | 0                                       | 8                                                                          |
| <b>African American</b>                       |                    |                                         |                                                                            |
| JHS                                           | 1,850              | 0                                       | 0                                                                          |
| HANDLS                                        | 890                | 0                                       | 13                                                                         |
| HUFS                                          | 981                | 0                                       | 4                                                                          |
| GENOA: African-Americans                      | 1,049              | 465                                     | 483                                                                        |
| ARIC: African-Americans                       | 2,445              | 0                                       | 18                                                                         |

**Supplementary Table 2: Study characteristics of cohorts of African American and Indian ethnicity.** Data are given as mean (standard deviation), if not indicated otherwise.

| <b>Study</b>             | <b>Sample size</b> | <b>Age, years</b> | <b>Sex, % women</b> | <b>eGFR<sub>crea</sub>, ml/min/1.73 m<sup>2</sup></b> | <b>Plasma sodium, mEq/l</b> | <b>plasma glucose, mg/dl</b> |
|--------------------------|--------------------|-------------------|---------------------|-------------------------------------------------------|-----------------------------|------------------------------|
| <b>African American</b>  |                    |                   |                     |                                                       |                             |                              |
| JHS                      | 1,850              | 49.4(11.7)        | 61.5                | 88.78 (17.7)                                          | 140.5 (2.2)                 | 91.4 (12.5)                  |
| HANDLS                   | 890                | 48.0 (8.96)       | 56.1                | 96.9 (20.5)                                           | 139.7 (2.6)                 | 94.8 (13.7)                  |
| HUFS                     | 981                | 46.9 (13.9)       | 58.6                | 107.1 (31.2)                                          | 137.6 (6.0)                 | 87.2 (14.0)                  |
| GENOA: African-Americans | 1,049              | 62.9 (9.4)        | 70.1                | 75.5 (19.5)                                           | 139.5 (2.1)                 | 99.4 (16.5)                  |
| ARIC: African-Americans  | 2,445              | 53.1 (5.7)        | 62.1                | 103.8 (23.0)                                          | 141.5 (2.4)                 | 100.6 (13.2)                 |
| <b>Asian Indian</b>      |                    |                   |                     |                                                       |                             |                              |
| LOLIPOP_IA610            | 5,654              | 55.0 (10.7)       | 15,9                | 81.0 (16.5)                                           | 139.6 (2.6)                 | 98.0 (16.6)                  |
| LOLIPOP_IA317            | 1,886              | 47.8 (10.4)       | 0,0                 | 82.1 (12.6)                                           | 139.6 (2.2)                 | 96.0 (14.9)                  |
| LOLIPOP_IAOmniEE         | 802                | 49.5 (9.8)        | 50,3                | 85.5 (18.8)                                           | 139.9 (2.2)                 | 94.6 (12.5)                  |
| LOLIPOP_IAP              | 423                | 50.8 (8.4)        | 0,0                 | 90.0 (14.0)                                           | 139.7 (2.3)                 | 98.5 (15.7)                  |

**Supplementary Table 3: Study descriptions**

| Study name (key references) | Study design                      | Total genotyped sample size | Study exclusions or disease enrichment                                                                                                                                                                                                                                                                                                                        | References (Pub-Med ID)                                                                                                                                                                                                                                 | Acknowledgments and funding source                                                                                                                                                                                                                                                                                                                                                                                                                                                                                                                                                                                                                                                                                                                                                                                                |
|-----------------------------|-----------------------------------|-----------------------------|---------------------------------------------------------------------------------------------------------------------------------------------------------------------------------------------------------------------------------------------------------------------------------------------------------------------------------------------------------------|---------------------------------------------------------------------------------------------------------------------------------------------------------------------------------------------------------------------------------------------------------|-----------------------------------------------------------------------------------------------------------------------------------------------------------------------------------------------------------------------------------------------------------------------------------------------------------------------------------------------------------------------------------------------------------------------------------------------------------------------------------------------------------------------------------------------------------------------------------------------------------------------------------------------------------------------------------------------------------------------------------------------------------------------------------------------------------------------------------|
| Amish Studies               | Population based "founder" cohort | 1264                        | age <20, severe chronic disease, call rate <95%, p <sub>HWE</sub> <10E-6. No enrichment                                                                                                                                                                                                                                                                       | <sup>1,2</sup>                                                                                                                                                                                                                                          | We thank our Amish research volunteers for their long-standing partnership in research, and the research staff at the Amish Research Clinic for their hard work and dedication. We are supported by grants and contracts from the NIH including R01 AG18728 (Amish Longevity Study), R01 HL088119 (Amish Calcification Study), U01 GM074518-04 (PAPI Study), U01 HL072515-06 (HAPI Study), U01 HL084756 and NIH K12RR023250 (University of Maryland MCRDP), the University of Maryland General Clinical Research Center, grant M01 RR 16500, the Baltimore Veterans Administration Medical Center Geriatrics Research and Education Clinical Center and the Paul Beeson Physician Faculty Scholars in Aging Program.                                                                                                              |
| ARIC: Europeans             | Prospective, population-based     | 9713                        | Of the 9713 genotyped individuals of European ancestry, we excluded 658 individuals based on discrepancies with previous genotypes, disagreement between reported and genotypic sex, one randomly selected member of a pair of first-degree relatives, or outlier based on measures of average DST or >8 SD away on any of the first 10 principal components. | <sup>3</sup><br><a href="https://www.2.csc.unc.edu/aric/sites/default/files/public/manuals/Clinical_Chemistry_Determinations.1_10.pdf">https://www.2.csc.unc.edu/aric/sites/default/files/public/manuals/Clinical_Chemistry_Determinations.1_10.pdf</a> | The ARIC study is carried out as a collaborative study supported by National Heart, Lung, and Blood Institute contracts (HHSN268201100005C, HHSN268201100006C, HHSN268201100007C, HHSN268201100008C, HHSN268201100009C, HHSN268201100010C, HHSN268201100011C, and HHSN268201100012C), R01HL087641, R01HL59367 and R01HL086694; National Human Genome Research Institute contract U01HG004402; and National Institutes of Health contract HHSN268200625226C. The authors thank the staff and participants of the ARIC study for their important contributions. Infrastructure was partly supported by Grant Number UL1RR025005, a component of the National Institutes of Health and NIH Roadmap for Medical Research. PS and AK were supported by the Emmy Noether Program of the German Research Foundation (KO 3598/2-1 to AK). |
| BLSA                        | Population based cohort           | 848                         | call rate <98.5%, sex misspecification                                                                                                                                                                                                                                                                                                                        | <sup>4</sup>                                                                                                                                                                                                                                            | The BLSA was supported by the Intramural Research Program of the NIH, National Institute on Aging                                                                                                                                                                                                                                                                                                                                                                                                                                                                                                                                                                                                                                                                                                                                 |
| FHS                         | Population based cohort           | 2494                        | Call rate<95%; p <sub>HWE</sub> <10E-06                                                                                                                                                                                                                                                                                                                       | <sup>5</sup>                                                                                                                                                                                                                                            | This research was conducted in part using data and resources from the Framingham Heart Study of the National Heart Lung and Blood Institute of the National Institutes of Health and Boston University School of Medicine. The analyses reflect intellectual input and resource development from the Framingham Heart Study investigators participating in the SNP Health Association Resource (SHARe) project. A portion of this research utilized the Linux Cluster for Genetic Analysis (LinGA-II) funded by the Robert Dawson Evans Endowment of the Department of Medicine at Boston University School of Medicine and Boston Medical Center.                                                                                                                                                                                |

|         |                                                                    |                             |                                                                                                                                                                                                                                                                                                                   |                 |                                                                                                                                                                                                                                                                                                                                                                                                                                                                                                                                                                                                                                                                                                                                                                                                                                                                                                                                                                                                                                                                                                                          |
|---------|--------------------------------------------------------------------|-----------------------------|-------------------------------------------------------------------------------------------------------------------------------------------------------------------------------------------------------------------------------------------------------------------------------------------------------------------|-----------------|--------------------------------------------------------------------------------------------------------------------------------------------------------------------------------------------------------------------------------------------------------------------------------------------------------------------------------------------------------------------------------------------------------------------------------------------------------------------------------------------------------------------------------------------------------------------------------------------------------------------------------------------------------------------------------------------------------------------------------------------------------------------------------------------------------------------------------------------------------------------------------------------------------------------------------------------------------------------------------------------------------------------------------------------------------------------------------------------------------------------------|
| COLAUS  | Prospective population-based                                       | 5150                        | none                                                                                                                                                                                                                                                                                                              | <sup>6</sup>    | The CoLaus authors thank Yolande Barreau, Mathieu Firmann, Vladimir Mayor, Anne-Lise Bastian, Binasa Ramic, Martine Moranville, Martine Baumer, Marcy Sagette, Jeanne Ecoffey and Sylvie Mermoud for data collection. The CoLaus study received financial contributions from GlaxoSmithKline, the Faculty of Biology and Medicine of Lausanne, the Swiss National Science Foundation (33CSCO-122661, 3200BO-111361/2, 3100AO-116323/1,310000-112552), Swiss National Science Foundation project grant 310030_146490 and NCCR Kidney.CH Program. The computations for CoLaus imputation were performed in part at the Vital-IT center for high performance computing of the Swiss Institute of Bioinformatics. MB is supported by the Swiss School of Public Health Plus (SSPH+). We thank Vincent Mooser for his contribution to the CoLaus study. The authors acknowledge support from the Swiss National Science Foundation project grant 310030_146490 and NCCR Kidney.CH Program. Work on this project was supported by the Swiss National Science Foundation project grant 310030_146490 and NCCR Kidney.CH Program |
| DIACORE | prospective cohort study of patients with diabetes mellitus type 2 | 1523                        | <ol style="list-style-type: none"> <li>1) Missing phenotype</li> <li>2) Ancestry not European</li> <li>3) Relatedness 2nd degree or closer</li> <li>4) Genetic gender discordant with phenotypic gender</li> <li>5) Gonosomal aberration</li> <li>6) Excess of Heterozygosity</li> <li>7) low callrate</li> </ol> | <sup>7</sup>    | Recruiting and follow-up examinations are supported by the KfH Stiftung Präventivmedizin. Genotyping is supported by the Else Kröner-Fresenius-Stiftung (2012_A147), the KfH Stiftung Präventivmedizin and the University Hospital Regensburg.                                                                                                                                                                                                                                                                                                                                                                                                                                                                                                                                                                                                                                                                                                                                                                                                                                                                           |
| GENOA   | Community-based, sibships                                          | 1532 (blacks)/1509 (whites) | The two GENOA cohorts were originally ascertained (1995-2000) through sibships in which at least 2 siblings had essential hypertension diagnosed prior to age 60 years. All siblings in the sibship were invited to participate, both normotensive and hypertensive.                                              | <sup>8-10</sup> | The Genetic Epidemiology Network of Arteriopathy (GENOA) study was supported by the National Heart, Lung and Blood Institute (HL054464, HL054481, HL071917, and HL87660) and the National Institute of Neurological Disorders and Stroke (NS041558) of the National institute of Health.                                                                                                                                                                                                                                                                                                                                                                                                                                                                                                                                                                                                                                                                                                                                                                                                                                 |

|           |                                        |      |                                                                                                                 |                   |                                                                                                                                                                                                                                                                                                                                                                                                                                                                                                                                                                                                                                                                                                                            |
|-----------|----------------------------------------|------|-----------------------------------------------------------------------------------------------------------------|-------------------|----------------------------------------------------------------------------------------------------------------------------------------------------------------------------------------------------------------------------------------------------------------------------------------------------------------------------------------------------------------------------------------------------------------------------------------------------------------------------------------------------------------------------------------------------------------------------------------------------------------------------------------------------------------------------------------------------------------------------|
| MrOS      | Population based                       | 4735 | Participants had to be $\geq 65$ years old, able to walk unassisted, and be without bilateral hip replacements. | <sup>11</sup>     | The Osteoporotic Fractures in Men (MrOS) study is supported by National Institutes of Health funding. The following institutes provide support: the National Institute of Arthritis and Musculoskeletal and Skin Diseases (NIAMS), the National Institute on Aging (NIA), the National Center for Research Resources (NCRR), and NIH Roadmap for Medical Research under the following grant numbers: U01 AR45580, U01 AR45614, U01 AR45632, U01 AR45647, U01 AR45654, U01 AR45583, U01 AG18197, U01-AG027810, and UL1 RR024140. The National Institute of Arthritis and Musculoskeletal and Skin Diseases (NIAMS) provided funding for the MrOS ancillary study "GWAS in MrOS and SOF" under the grant number RC2ARO58973. |
| MICROS    | cross-sectional population based study | 1391 | call rate <95%, excess of heterozygosity, outliers by IBS clustering analysis. No enrichment                    | <sup>12, 13</sup> | We thank the primary care practitioners Raffaella Stocker, Stefan Waldner, Toni Pizzocco, Josef Plangger, Ugo Marcadent and the personnel of the Hospital of Silandro (Department of Laboratory Medicine) for their participation and collaboration in the research project. The MICROS study was supported by the Ministry of Health and Department of Educational Assistance, University and Research of the Autonomous Province of Bolzano and the South Tyrolean Sparkasse Foundation.                                                                                                                                                                                                                                 |
| KORA F3   | Population based                       | 1644 | none                                                                                                            | <sup>14, 15</sup> | The KORA research platform (KORA, Cooperative Research in the Region of Augsburg) was initiated and financed by the Helmholtz Zentrum München - German Research Center for Environmental Health, which is funded by the German Federal Ministry of Education and Research and by the State of Bavaria. Furthermore, KORA research was supported within the Munich Center of Health Sciences (MC Health), Ludwig-Maximilians-Universität, as part of LMUinnovativ.                                                                                                                                                                                                                                                          |
| KORA F4   | Population based                       | 1814 | none                                                                                                            | <sup>14, 15</sup> | The KORA research platform (KORA, Cooperative Research in the Region of Augsburg) was initiated and financed by the Helmholtz Zentrum München - German Research Center for Environmental Health, which is funded by the German Federal Ministry of Education and Research and by the State of Bavaria. Furthermore, KORA research was supported within the Munich Center of Health Sciences (MC Health), Ludwig-Maximilians-Universität, as part of LMUinnovativ.                                                                                                                                                                                                                                                          |
| InCHIANTI | Population based cohort                | 1210 | call rate <97%, Heterozygosity >0.3, sex misspecification                                                       | <sup>16</sup>     | The InCHIANTI study baseline (1998-2000) was supported as a "targeted project" (ICS110.1/RF97.71) by the Italian Ministry of Health and in part by the U.S. National Institute on Aging (Contracts: 263 MD 9164 and 263 MD 821336).                                                                                                                                                                                                                                                                                                                                                                                                                                                                                        |

|                                     |                                              |      |                                                                                                                                                                    |                   |                                                                                                                                                                                                                                                                                                                                                                                                                                                                                                                                                                                                                                                                                                                    |
|-------------------------------------|----------------------------------------------|------|--------------------------------------------------------------------------------------------------------------------------------------------------------------------|-------------------|--------------------------------------------------------------------------------------------------------------------------------------------------------------------------------------------------------------------------------------------------------------------------------------------------------------------------------------------------------------------------------------------------------------------------------------------------------------------------------------------------------------------------------------------------------------------------------------------------------------------------------------------------------------------------------------------------------------------|
| LOLIPOP_EW 610                      | Population based cohort                      | 945  | Duplicates, gender discrepancy, contaminated samples, relatedness, call rate <95%                                                                                  | <sup>17, 18</sup> | The LOLIPOP study is supported by the National Institute for Health Research (NIHR) Comprehensive Biomedical Research Centre Imperial College Healthcare NHS Trust, the British Heart Foundation (SP/04/002), the Medical Research Council (G0601966,G0700931), the Wellcome Trust (084723/Z/08/Z) the NIHR (RP-PG-0407-10371),European Union FP7 (EpiMigrant, 279143) and Action on Hearing Loss (G51). The work was carried out in part at the NIHR/Wellcome Trust Imperial Clinical Research Facility. We thank the participants and research staff who made the study possible.                                                                                                                                |
| LOLIPOP_EW A                        | Population based cohort                      | 878  | Duplicates, contaminated samples, relatedness, samples already in EW610, call rate <95%                                                                            | <sup>19</sup>     | The LOLIPOP study is supported by the National Institute for Health Research (NIHR) Comprehensive Biomedical Research Centre Imperial College Healthcare NHS Trust, the British Heart Foundation (SP/04/002), the Medical Research Council (G0601966,G0700931), the Wellcome Trust (084723/Z/08/Z) the NIHR (RP-PG-0407-10371),European Union FP7 (EpiMigrant, 279143) and Action on Hearing Loss (G51). The work was carried out in part at the NIHR/Wellcome Trust Imperial Clinical Research Facility. We thank the participants and research staff who made the study possible.                                                                                                                                |
| LOLIPOP_EW P                        | Population based cohort with some enrichment | 1006 | Duplicates, contaminated samples, samples already in EW610, call rate <95%, samples ascertained on Adult Treatment Panel (ATP) III criteria for metabolic syndrome | <sup>20</sup>     | The LOLIPOP study is supported by the National Institute for Health Research (NIHR) Comprehensive Biomedical Research Centre Imperial College Healthcare NHS Trust, the British Heart Foundation (SP/04/002), the Medical Research Council (G0601966,G0700931), the Wellcome Trust (084723/Z/08/Z) the NIHR (RP-PG-0407-10371),European Union FP7 (EpiMigrant, 279143) and Action on Hearing Loss (G51). The work was carried out in part at the NIHR/Wellcome Trust Imperial Clinical Research Facility. We thank the participants and research staff who made the study possible.                                                                                                                                |
| LURIC                               | case-control                                 | 2984 | any acute disease other than acute coronary syndrome, malignancy within the past 5 years                                                                           | <sup>21</sup>     | We extend our appreciation to the participants of the LURIC study; without their collaboration, this article would not have been written. We thank the LURIC study team who were either temporarily or permanently involved in patient recruitment as well as sample and data handling, in addition to the laboratory staff at the Ludwigshafen General Hospital and the Universities of Freiburg, Ulm, and Graz, Germany. LURIC received funding through the 6th Framework Programme (integrated project Bloodomics, grant LSHM-CT-2004-503485) and the 7th Framework Programme (integrated project AtheroRemo, Grant Agreement number 201668 and RiskyCAD, grant agreement number 305739) of the European Union. |
| Ogliastra Genetic Park Talana study | Population based "founder" cohort            | 806  | age<18, call rate per person <90%, call rate per SNP<90%, MAF<0.01, HWEp<10E-6                                                                                     | <sup>22, 23</sup> | We thank the Ogliastra population and all the individuals who participated in this study. We are very grateful to the municipal administrators for their collaboration to the project and for economic and logistic support. This work was supported by grants from the Italian Ministry of Education, University and Research (MIUR) no.5571/DSPAR/2002 and (FIRB) D. M. no. 718/Ric/2005.                                                                                                                                                                                                                                                                                                                        |

|                              |                                               |      |                                                                        |                   |                                                                                                                                                                                                                                                                                                                                                                                                                                                                                                                                                                                                                                                                                                                                                                                                                                                                                                                                                                                                                                                                   |
|------------------------------|-----------------------------------------------|------|------------------------------------------------------------------------|-------------------|-------------------------------------------------------------------------------------------------------------------------------------------------------------------------------------------------------------------------------------------------------------------------------------------------------------------------------------------------------------------------------------------------------------------------------------------------------------------------------------------------------------------------------------------------------------------------------------------------------------------------------------------------------------------------------------------------------------------------------------------------------------------------------------------------------------------------------------------------------------------------------------------------------------------------------------------------------------------------------------------------------------------------------------------------------------------|
| Ogliastra Genetic Park study | unrelated individuals (males) from 7 villages | 406  | call rate per person <90%, call rate per SNP<90%, MAF<0.01, HWEp<10E-6 |                   | as above                                                                                                                                                                                                                                                                                                                                                                                                                                                                                                                                                                                                                                                                                                                                                                                                                                                                                                                                                                                                                                                          |
| SHIP                         | population based                              | 4079 | none                                                                   | <sup>24, 25</sup> | SHIP is part of the Community Medicine Research net of the University of Greifswald, Germany, which is funded by the Federal Ministry of Education and Research (grants no. 01ZZ9603, 01ZZ0103, and 01ZZ0403), the Ministry of Cultural Affairs as well as the Social Ministry of the Federal State of Mecklenburg-West Pomerania, and the network 'Greifswald Approach to Individualized Medicine (GANI_MED)' funded by the Federal Ministry of Education and Research (grant 03IS2061A). Genome-wide data have been supported by the Federal Ministry of Education and Research (grant no. 03ZIK012) and a joint grant from Siemens Healthcare, Erlangen, Germany and the Federal State of Mecklenburg- West Pomerania. The University of Greifswald is a member of the 'Center of Knowledge Interchange' program of the Siemens AG and the Caché Campus program of the InterSystems GmbH.                                                                                                                                                                      |
| SHIP-TREND                   | population based                              | 986  | none                                                                   | <sup>25</sup>     | SHIP is part of the Community Medicine Research net of the University of Greifswald, Germany, which is funded by the Federal Ministry of Education and Research (grants no. 01ZZ9603, 01ZZ0103, and 01ZZ0403), the Ministry of Cultural Affairs as well as the Social Ministry of the Federal State of Mecklenburg-West Pomerania, and the network 'Greifswald Approach to Individualized Medicine (GANI_MED)' funded by the Federal Ministry of Education and Research (grant 03IS2061A). Whole-body MR imaging was supported by a joint grant from Siemens Healthcare, Erlangen, Germany and the Federal State of Mecklenburg West Pomerania. The University of Greifswald is a member of the 'Center of Knowledge Interchange' program of the Siemens AG and the Caché Campus program of the InterSystems GmbH. The SHIP authors are grateful to Mario Stanke for the opportunity to use his Server Cluster for the SNP imputation as well as to Holger Prokisch and Thomas Meitinger (Helmholtz Zentrum München) for the genotyping of the SHIP-TREND cohort. |

|                     |                                    |      |                                                                                                                                                                                                                                                                                                                                          |               |                                                                                                                                                                                                                                                                                                                                                                                                                                                                                                                                                                                                                                                                                                                                                                                                                                                                                                                                                                                                                                                                                                                                                                                                                                                                                                                                                                                                                                                                                                                                                                                                                                                                                                                                                                                                                        |
|---------------------|------------------------------------|------|------------------------------------------------------------------------------------------------------------------------------------------------------------------------------------------------------------------------------------------------------------------------------------------------------------------------------------------|---------------|------------------------------------------------------------------------------------------------------------------------------------------------------------------------------------------------------------------------------------------------------------------------------------------------------------------------------------------------------------------------------------------------------------------------------------------------------------------------------------------------------------------------------------------------------------------------------------------------------------------------------------------------------------------------------------------------------------------------------------------------------------------------------------------------------------------------------------------------------------------------------------------------------------------------------------------------------------------------------------------------------------------------------------------------------------------------------------------------------------------------------------------------------------------------------------------------------------------------------------------------------------------------------------------------------------------------------------------------------------------------------------------------------------------------------------------------------------------------------------------------------------------------------------------------------------------------------------------------------------------------------------------------------------------------------------------------------------------------------------------------------------------------------------------------------------------------|
| The Rotterdam Study | Prospective population based study | 5974 | Any samples with a call rate below 97.5%, excess autosomal heterozygosity >0.336 (~FDR <0.1%), mismatch between called and phenotypic gender, or if there were outliers identified by the IBS clustering analysis (see below) with >3 standard deviations from population mean or IBS probabilities >97% were excluded from the analysis | <sup>26</sup> | The generation and management of GWAS genotype data for the Rotterdam Study was executed by the Human Genotyping Facility of the Genetic Laboratory of the Department of Internal Medicine, Erasmus MC, Rotterdam, The Netherlands. The GWAS datasets are supported by the Netherlands Organisation of Scientific Research NWO Investments (nr. 175.010.2005.011, 911-03-012), the Genetic Laboratory of the Department of Internal Medicine, Erasmus MC, the Research Institute for Diseases in the Elderly (014-93-015; RIDE2), the Netherlands Genomics Initiative (NGI)/Netherlands Organisation for Scientific Research (NWO) Netherlands Consortium for Healthy Aging (NCHA), project nr. 050-060-810. We thank Pascal Arp, Mila Jhamai, Marijn Verkerk, Lizbeth Herrera and Marjolein Peters, MSc, and Carolina Medina-Gomez, MSc, for their help in creating the GWAS database, and Karol Estrada, PhD, Yurii Aulchenko, PhD, and Carolina Medina-Gomez, MSc, for the creation and analysis of imputed data. The Rotterdam Study is funded by Erasmus Medical Center and Erasmus University, Rotterdam, the Netherlands Organization for the Health Research and Development (ZonMw), the Research Institute for Diseases in the Elderly (RIDE), the Ministry of Education, Culture and Science, the Ministry for Health, Welfare and Sports, the European Commission (DG XII), and the Municipality of Rotterdam. The authors are grateful to the study participants, the staff from the Rotterdam Study and the participating general practitioners and pharmacists. Dr Franco works in ErasmusAGE, a center for aging research across the life course funded by Nestlé Nutrition (Nestec Ltd); Metagenics Inc; and AXA. Abbas Dehghan is supported by NOW grant (veni, 916.12.154 ) and the EUR Fellowship. |
| SardiNIA            | family-based cohort                | 6148 |                                                                                                                                                                                                                                                                                                                                          | <sup>27</sup> | This work was supported by the National Institute on Aging (contract NO1-AG-1-2109). We thank the many individuals who generously participated in this study, Monsignore Piseddu, Bishop of Ogliastra, the mayors and citizens of the Sardinian towns (Lanusei, Ilbono, Arzana, and Elini) for their volunteerism and cooperation;                                                                                                                                                                                                                                                                                                                                                                                                                                                                                                                                                                                                                                                                                                                                                                                                                                                                                                                                                                                                                                                                                                                                                                                                                                                                                                                                                                                                                                                                                     |
| FINCAVAS            | Cross-sectional follow-up study    | 2544 | call rate < 98%, pHWE < 10E-4. Enrichment of coronary heart disease.                                                                                                                                                                                                                                                                     | <sup>28</sup> | This work was supported by the Competitive Research Funding of the Tampere University Hospital (Grant 9M048 and 9N035), the Finnish Cultural Foundation, the Finnish Foundation for Cardiovascular Research, the Emil Aaltonen Foundation, Finland, and the Tampere Tuberculosis Foundation. The authors thank the staff of the Department of Clinical Physiology for collecting the exercise test data.                                                                                                                                                                                                                                                                                                                                                                                                                                                                                                                                                                                                                                                                                                                                                                                                                                                                                                                                                                                                                                                                                                                                                                                                                                                                                                                                                                                                               |



|                              |                                                      |        |                                                                                                                                                                                                                                                                                                                                                                                                                           |                   |                                                                                                                                                                                                                                                                                                                                                                                                                                                                                                                                                                                                                                                                                                                                                                                                                                                                                                                                                                                                                                                                                                                                                                                                                |
|------------------------------|------------------------------------------------------|--------|---------------------------------------------------------------------------------------------------------------------------------------------------------------------------------------------------------------------------------------------------------------------------------------------------------------------------------------------------------------------------------------------------------------------------|-------------------|----------------------------------------------------------------------------------------------------------------------------------------------------------------------------------------------------------------------------------------------------------------------------------------------------------------------------------------------------------------------------------------------------------------------------------------------------------------------------------------------------------------------------------------------------------------------------------------------------------------------------------------------------------------------------------------------------------------------------------------------------------------------------------------------------------------------------------------------------------------------------------------------------------------------------------------------------------------------------------------------------------------------------------------------------------------------------------------------------------------------------------------------------------------------------------------------------------------|
| Lifelines                    | Population-based                                     | 13.386 | none                                                                                                                                                                                                                                                                                                                                                                                                                      | <sup>29, 30</sup> | The LifeLines Cohort Study, and generation and management of GWAS genotype data for the LifeLines Cohort Study is supported by the Netherlands Organization of Scientific Research NWO (grant 175.010.2007.006), the Economic Structure Enhancing Fund (FES) of the Dutch government, the Ministry of Economic Affairs, the Ministry of Education, Culture and Science, the Ministry for Health, Welfare and Sports, the Northern Netherlands Collaboration of Provinces (SNN), the Province of Groningen, University Medical Center Groningen, the University of Groningen, Dutch Kidney Foundation and Dutch Diabetes Research Foundation. We thank Behrooz Alizadeh, Annemieke Boesjes, Marcel Bruinenberg, Noortje Festen, Pim van der Harst, Ilja Nolte, Lude Franke, Mitra Valimohammadi for their help in creating the GWAS database, and Rob Bieringa, Joost Keers, René Oostergo, Rosalie Visser, Judith Vonk for their work related to data-collection and validation. The authors are grateful to the study participants, the staff from the LifeLines Cohort Study and the contributing research centers delivering data to LifeLines and the participating general practitioners and pharmacists. |
| MESA                         | Community-based prospective cohort study             | 2455   | age <45, age>84, Prevalent cardiovascular disease, defined as myocardial infarction, angina, stroke, transient ischemic attack, heart failure, atrial fibrillation, use of nitroglycerin, prior angioplasty, coronary artery bypass graft surgery, valve replacement, pacemaker or defibrillator implant, or any surgery on the heart or arteries, call rate <95%. For this study, only European Americans were analysed. | <sup>31</sup>     | MESA and the MESA SHARe project are conducted and supported by the National Heart, Lung, and Blood Institute (NHLBI) in collaboration with MESA investigators. Support for MESA is provided by contracts HHSN268201500003I, N01-HC-95159, N01-HC-95160, N01-HC-95161, N01-HC-95162, N01-HC-95163, N01-HC-95164, N01-HC-95165, N01-HC-95166, N01-HC-95167, N01-HC-95168, N01-HC-95169, UL1-TR-001079, UL1-TR-000040, and DK063491. Serum sodium data were funded by NHLBI grant HL096875.                                                                                                                                                                                                                                                                                                                                                                                                                                                                                                                                                                                                                                                                                                                       |
|                              |                                                      |        |                                                                                                                                                                                                                                                                                                                                                                                                                           |                   |                                                                                                                                                                                                                                                                                                                                                                                                                                                                                                                                                                                                                                                                                                                                                                                                                                                                                                                                                                                                                                                                                                                                                                                                                |
| <b>Asian Indian ancestry</b> |                                                      |        |                                                                                                                                                                                                                                                                                                                                                                                                                           |                   |                                                                                                                                                                                                                                                                                                                                                                                                                                                                                                                                                                                                                                                                                                                                                                                                                                                                                                                                                                                                                                                                                                                                                                                                                |
| LOLIPOP_IA6 10               | CHD cases and controls (CHD was used as a covariate) | 7032   | Duplicates, gender discrepancy, ethnic outliers, contaminated samples, relatedness, call rate <95. Enriched with CHD cases (a case-control study).                                                                                                                                                                                                                                                                        | <sup>32, 33</sup> | The LOLIPOP study is supported by the National Institute for Health Research (NIHR) Comprehensive Biomedical Research Centre Imperial College Healthcare NHS Trust, the British Heart Foundation (SP/04/002), the Medical Research Council (G0601966,G0700931), the Wellcome Trust (084723/Z/08/Z) the NIHR (RP-PG-0407-10371),European Union FP7 (EpiMigrant, 279143) and Action on Hearing Loss (G51). The work was carried out in part at the NIHR/Wellcome Trust Imperial Clinical Research Facility. We thank the participants and research staff who made the study possible.                                                                                                                                                                                                                                                                                                                                                                                                                                                                                                                                                                                                                            |

|                         |                                              |      |                                                                                                                                                                       |               |                                                                                                                                                                                                                                                                                                                                                                                                                                                                                                                                                                                     |
|-------------------------|----------------------------------------------|------|-----------------------------------------------------------------------------------------------------------------------------------------------------------------------|---------------|-------------------------------------------------------------------------------------------------------------------------------------------------------------------------------------------------------------------------------------------------------------------------------------------------------------------------------------------------------------------------------------------------------------------------------------------------------------------------------------------------------------------------------------------------------------------------------------|
| LOLIPOP_IA3<br>17       | Population based cohort with some enrichment | 2694 | Duplicates, gender discrepancy, ethnic outliers, contaminated samples, relatedness, call rate <95%, samples enriched for insulin resistance and component phenotypes. | <sup>34</sup> | The LOLIPOP study is supported by the National Institute for Health Research (NIHR) Comprehensive Biomedical Research Centre Imperial College Healthcare NHS Trust, the British Heart Foundation (SP/04/002), the Medical Research Council (G0601966,G0700931), the Wellcome Trust (084723/Z/08/Z) the NIHR (RP-PG-0407-10371),European Union FP7 (EpiMigrant, 279143) and Action on Hearing Loss (G51). The work was carried out in part at the NIHR/Wellcome Trust Imperial Clinical Research Facility. We thank the participants and research staff who made the study possible. |
| LOLIPOP_IAO<br>mniEE    | Population based cohort                      | 1248 | Duplicates, gender discrepancy, ethnic outliers, contaminated samples, relatedness, call rate <98%, extreme heterozygosity                                            | <sup>35</sup> | The LOLIPOP study is supported by the National Institute for Health Research (NIHR) Comprehensive Biomedical Research Centre Imperial College Healthcare NHS Trust, the British Heart Foundation (SP/04/002), the Medical Research Council (G0601966,G0700931), the Wellcome Trust (084723/Z/08/Z) the NIHR (RP-PG-0407-10371),European Union FP7 (EpiMigrant, 279143) and Action on Hearing Loss (G51). The work was carried out in part at the NIHR/Wellcome Trust Imperial Clinical Research Facility. We thank the participants and research staff who made the study possible. |
| LOLIPOP_IAP             | Population based cohort with some enrichment | 1005 | Duplicates, contaminated samples, samples already in IA610, call rate <95%, samples ascertained on Adult Treatment Panel (ATP) III criteria for metabolic syndrome    | <sup>20</sup> | The LOLIPOP study is supported by the National Institute for Health Research (NIHR) Comprehensive Biomedical Research Centre Imperial College Healthcare NHS Trust, the British Heart Foundation (SP/04/002), the Medical Research Council (G0601966,G0700931), the Wellcome Trust (084723/Z/08/Z) the NIHR (RP-PG-0407-10371),European Union FP7 (EpiMigrant, 279143) and Action on Hearing Loss (G51). The work was carried out in part at the NIHR/Wellcome Trust Imperial Clinical Research Facility. We thank the participants and research staff who made the study possible. |
|                         |                                              |      |                                                                                                                                                                       |               |                                                                                                                                                                                                                                                                                                                                                                                                                                                                                                                                                                                     |
| <b>African American</b> |                                              |      |                                                                                                                                                                       |               |                                                                                                                                                                                                                                                                                                                                                                                                                                                                                                                                                                                     |
| JHS                     | Population based                             | 1850 | Age between 35 and 84 years for unrelated cohort and age >20 for family cohort                                                                                        | <sup>36</sup> | We thank the Jackson Heart Study (JHS) participants and staff for their contributions to this work. The JHS is supported by contracts HHSN268201300046C, HHSN268201300047C, HHSN268201300048C, HHSN268201300049C, HHSN268201300050C from the National Heart, Lung, and Blood Institute and the National Institute on Minority Health and Health Disparities.                                                                                                                                                                                                                        |
| HANDLS                  | Population based                             | 1024 | area probability sample of Baltimore based on the 2000 Census                                                                                                         | <sup>37</sup> | This research was supported by the Intramural Research Program of the NIH, National Institute on Aging and the National Center on Minority Health and Health Disparities (project # Z01-AG000513 and human subjects protocol number 09-AG-N248). Data analyses for the HANDLS study utilized the high-performance computational capabilities of the Biowulf Linux cluster at the                                                                                                                                                                                                    |

|                          |                               |                             |                                                                                                                                                                                                                                                                                                                                                           |                                                                                                                                                                                                                                                       |                                                                                                                                                                                                                                                                                                                                                                                                                                                                                                                                                                                                                                                                                                                                                                                                                                                                                                                                                                                            |
|--------------------------|-------------------------------|-----------------------------|-----------------------------------------------------------------------------------------------------------------------------------------------------------------------------------------------------------------------------------------------------------------------------------------------------------------------------------------------------------|-------------------------------------------------------------------------------------------------------------------------------------------------------------------------------------------------------------------------------------------------------|--------------------------------------------------------------------------------------------------------------------------------------------------------------------------------------------------------------------------------------------------------------------------------------------------------------------------------------------------------------------------------------------------------------------------------------------------------------------------------------------------------------------------------------------------------------------------------------------------------------------------------------------------------------------------------------------------------------------------------------------------------------------------------------------------------------------------------------------------------------------------------------------------------------------------------------------------------------------------------------------|
|                          |                               |                             |                                                                                                                                                                                                                                                                                                                                                           |                                                                                                                                                                                                                                                       | National Institutes of Health, Bethesda, Md. ( <a href="http://biowulf.nih.gov">http://biowulf.nih.gov</a> ).                                                                                                                                                                                                                                                                                                                                                                                                                                                                                                                                                                                                                                                                                                                                                                                                                                                                              |
| HUFS                     | Family based                  | 981                         | age < 20, non T2D, unrelated from 328 pedigrees                                                                                                                                                                                                                                                                                                           | <sup>38-40</sup>                                                                                                                                                                                                                                      | The HUFS (Howard University Family Study) was supported by grants S06GM008016-380111 to AA and S06GM008016-320107 to CR, both from the NIGMS/MBRS/SCORE Program. Participant enrollment for the HUFS was carried out at the Howard University General Clinical Research Center (GCRC), which was supported by grant 2M01RR010284 from the National Center for Research Resources (NCRR), a component of the National Institutes of Health (NIH). This research was supported in part by the NIH Intramural Research Program in the Center for Research on Genomics and Global Health (CRGGH) with support from the National Human Genome Research Institute, the National Institute of Diabetes and Digestive and Kidney Diseases, the Center for Information Technology, and the Office of the Director at the National Institutes of Health (Z01HG200362). The funders had no role in study design, data collection and analysis, decision to publish, or preparation of the manuscript. |
| ARIC: African Americans  | Prospective, population-based | 3207                        | Of the 3207 genotyped African-American individuals, we excluded 336 individuals based on discrepancies with previous genotypes, disagreement between reported and genotypic sex, one randomly selected member of a pair of first-degree relatives, or outlier based on measures of average DST or >8 SD away on any of the first 10 principal components. | <sup>3</sup><br><a href="https://www2.csc.unc.edu/aric/sites/default/files/public/manuals/Clinical_Chemistry_Determinations.1_10.pdf">https://www2.csc.unc.edu/aric/sites/default/files/public/manuals/Clinical_Chemistry_Determinations.1_10.pdf</a> | The ARIC study is carried out as a collaborative study supported by National Heart, Lung, and Blood Institute contracts (HHSN268201100005C, HHSN268201100006C, HHSN268201100007C, HHSN268201100008C, HHSN268201100009C, HHSN268201100010C, HHSN268201100011C, and HHSN268201100012C), R01HL087641, R01HL59367 and R01HL086694; National Human Genome Research Institute contract U01HG004402; and National Institutes of Health contract HHSN268200625226C. The authors thank the staff and participants of the ARIC study for their important contributions. Infrastructure was partly supported by Grant Number UL1RR025005, a component of the National Institutes of Health and NIH Roadmap for Medical Research. PS and AK were supported by the Emmy Noether Program of the German Research Foundation (KO 3598/2-1 to AK).                                                                                                                                                          |
| GENOA: African-Americans | Community-based, sibships     | 1532 (blacks)/1509 (whites) | The two GENOA cohorts were originally ascertained (1995-2000) through sibships in which at least 2 siblings had essential hypertension diagnosed prior to age 60 years. All siblings in the sibship were invited to participate, both normotensive and hypertensive.                                                                                      | <sup>8,9</sup>                                                                                                                                                                                                                                        | The Genetic Epidemiology Network of Arteriopathy (GENOA) study was supported by the National Heart, Lung and Blood Institute (HL054464, HL054481, HL071917, and HL87660) and the National Institute of Neurological Disorders and Stroke (NS041558) of the National Institute of Health.                                                                                                                                                                                                                                                                                                                                                                                                                                                                                                                                                                                                                                                                                                   |

**Supplementary Table 4: Genotyping and Imputation Platforms Used by all Participating Studies**

| Study Name    | Array type             | Genotype calling                    | QC filters for genotyped SNPs used for imputation  | No of SNPs used for imputation | Imputation - one or two step approach; programs used | Imputation Reference panel (NCBI build)                               | Filtering of imputed genotypes | Data management and statistical analysis                        | population stratification or principal components (PCs)                 |
|---------------|------------------------|-------------------------------------|----------------------------------------------------|--------------------------------|------------------------------------------------------|-----------------------------------------------------------------------|--------------------------------|-----------------------------------------------------------------|-------------------------------------------------------------------------|
| Amish Studies | Affymetrix 500K        | BRLMM                               | MAF < 0.01, non-HapMap, call rate <95%, pHWE<10E-6 | 338,598                        | MACH version 1.0.15                                  | phased CEU haplotypes, HapMap release 22 (build 36)                   | none                           | Measured genotype accounting for polygenic component            | NA                                                                      |
| ARIC          | Affymetrix 6.0         | Birdseed                            | call rate <95%, MAF<1%, pHWE <10e-5                | 669,450                        | MACH v1.0.16                                         | phased CEU haplotypes, HapMap release 22 (build 36)                   | none                           | R, ProbABEL, PLINK                                              | Adjusted for any of the first 10 PC associated with phenotype at p<0.05 |
| FINCAVAS      | Metabochip             | GenomeStudio                        | MAF < 0.01, call rate <98%, pHWE<10E-4             | 116,699                        | SHAPEIT v2 / IMPUTE v2.3.0                           | 1000Genomes Phase I integrated variant set release (v3) in (build 37) | none                           |                                                                 | NA                                                                      |
| BLSA          | Illumina 550K          | Beadstudio                          | MAF < 0.01, non-HapMap, call rate <99%, pHWE<10E-4 | 514,027                        | MACH version 1.0.15                                  | phased CEU haplotypes, HapMap release 22 (build 36)                   | none                           | merlinoffline                                                   | Genomic Control                                                         |
| COLAUS        | Affymetrix 500K        | Affymetrix                          | call rate <90%, pHWE<10E-7                         | 411,984                        | MACH                                                 | CEU, Hapmap22, build 36                                               | none                           | R/Matlab                                                        | 10 first PCs                                                            |
| DIACORE       | Axiom UK Biobank Array | Axiom GT1 in Genotyping Console 4.0 | call rate ≥95%, pHWE ≥ 10-6                        | 799,756                        | minimac                                              | Giant 100 Genomes All                                                 | none                           | R                                                               | NA                                                                      |
| FHS           | Affymetrix 500K        | BRLMM                               | Call rate <95%; pHWE<10E-6                         | 503,526                        | MACH v.1.0.15                                        | Phased CEU haplotypes, HapMap release 22                              | none                           | R, lmeKin function in Kinship package for continuous traits and | NA                                                                      |

|                  |                                 |                         |                                                               |           |                                         |                                                     |                    |                                                       |                                                                        |
|------------------|---------------------------------|-------------------------|---------------------------------------------------------------|-----------|-----------------------------------------|-----------------------------------------------------|--------------------|-------------------------------------------------------|------------------------------------------------------------------------|
|                  |                                 |                         |                                                               |           |                                         | (build 36)                                          |                    | gee function in GEE package for dichotomous traits    |                                                                        |
| GENOA: Europeans | Affymetric 6.0 and              | Birdseed for Affymatrix | call rate <95%, MAF =0, flag for pHWE, MAF =0, flag for pHWE, | 1,434,182 | MACH version 1.0.15                     | Phased CEU haplotypes, HapMap release 22 (build 36) | none               | dosage accounting for family relatedness              | NA                                                                     |
| MrOS             | Illumina HumanOmni1_Quad_v1-0 B | BeadStudio              | MAF < 0.01, call rate <90%, pHWE<10E-6                        | 740,713   | MACH (phasing) and MINIMAC (imputation) | HapMap release 22 (build 36)                        | RSQ < 0.3 excluded | R                                                     | First 4 PCs                                                            |
| MICROS           | Illumina 300k (HumHap300 v2)    | BeadStudio              | MAF>0.01, call rate>98%, pHWE<10E-6                           | 292,917   | MACH version 1.0.16                     | Phased CEU haplotypes, HapMap release 22 (build 36) | none               | polygenic linear model                                | Adjustment for participant relatedness based on genomic kinship matrix |
| KORA F3          | Affymetric 500K                 | BRLMM                   | call rate 93%                                                 | 490,033   | MACH version 1.0.9                      | phased CEU haplotypes, HapMap release 21 (build 35) | none               |                                                       | NA                                                                     |
| KORA F4          | Affymetric 6.0                  | Birdseed2               |                                                               | 651,596   | MACH v1.0.15                            | phased CEU haplotypes, HapMap release 22 (build 36) | none               |                                                       | NA                                                                     |
| LOLIPOP_EW6 10   | Illumina Human610               | BeadStudio              | MAF < 0.01, call rate <95%, pHWE<10E-6                        | 544,620   | IMPUTE2 V2.3.0                          | phased CEU haplotypes, HapMap release 22 (build 36) | none               | snptest was used for association with additive effect | First five PCs included                                                |
| LOLIPOP_EWA      | Affymetric 500K                 | BRLMN                   | MAF < 0.01, call rate <95%, pHWE<10E-6                        | 374,773   | IMPUTE2 V2.3.0                          | phased CEU haplotypes, HapMap release 22 (build 36) | none               | snptest was used for association with additive effect | First five PCs included                                                |
| LOLIPOP_EWP      | Perlegen custom                 | Perlegen custom         | MAF < 0.01, call rate <95%,                                   | 184,469   | IMPUTE2 V2.3.0                          | phased CEU haplotypes,                              | none               | snptest was used for association with                 | First five PCs                                                         |

|            |                        |              |                                                                                                                |           |                     |                                                     |                                         |                                                    |                 |
|------------|------------------------|--------------|----------------------------------------------------------------------------------------------------------------|-----------|---------------------|-----------------------------------------------------|-----------------------------------------|----------------------------------------------------|-----------------|
|            |                        |              | pHWE<10E-6                                                                                                     |           |                     | HapMap release 22 (build 36)                        |                                         | additive effect                                    | included        |
| InCHIANTI  | Illumina 550K          | Beadstudio   | MAF < 0.01, non-HapMap, call rate <99%, pHWE<10E-6                                                             | 498,838   | MACH version 1.0.15 | phased CEU haplotypes, HapMap release 22 (build 36) | none                                    | merlinoffline                                      | Genomic Control |
| Lifelines  | Illumina Cyto SNP12 v2 | GenomeStudio | SNPs with Callrate < 95%, pHWE < 0.001, MAF < 0.01, samples with excess heterozygosity or non-caucasian origin | 268,407   | BEAGLE v3.1.0       | Hapmap CEU, rel 24, build 36                        | none                                    | Analysis in PLINK                                  | PCs 1-10        |
| LURIC      | Affymetrix 6.0         | Birdseed v2  | MAF < 1%, call rate < 98%, pHWE < 10E-4                                                                        | 686,195   | MACH version 1.0.15 | phased CEU haplotypes, HapMap release 22 (build 36) | none                                    |                                                    | PCA             |
| OGP_Talana | Affymetrix 500K        | BRLMM        | MAF < 0.01, call rate <90%, pHWE<10E-6                                                                         | 373,685   | MACH version 1.0.15 | phased CEU haplotypes, HapMap release 22 (build 36) | none                                    | R, GenABEL; mixed model to account for relatedness | NA              |
| OGP        | Affymetrix 500K        | BRLMM        | MAF < 0.01, call rate <90%, pHWE<10E-6                                                                         | 399,556   | MACH version 1.0.15 | phased CEU haplotypes, HapMap release 22 (build 36) | none                                    | R, GenABEL                                         | NA              |
| SHIP       | Affymetrix SNP 6       | Birdseed2    | none                                                                                                           | 869,224   | IMPUTE v0.5.0       | phased CEU haplotypes, HapMap release 22 (build 36) | none                                    | IntserSystems Caché, InforSense, PLINK             | 10 PCs          |
| SHIP-TREND | Illumina Omni 2.5      | GenCall      | pHWE <= 0.0001, call rate <= 90%, MAF=0                                                                        | 1,782,967 | IMPUTE v2.1.2.3     | phased CEU haplotypes, HapMap release 22 (build 36) | duplicate rs id but different positions | IntserSystems Caché, InforSense, PLINK             | 10 PCs          |

|                                 |                                               |              |                                                                                                                           |         |                                                                                                                            |                                                                                                                                |                                   |                            |                          |
|---------------------------------|-----------------------------------------------|--------------|---------------------------------------------------------------------------------------------------------------------------|---------|----------------------------------------------------------------------------------------------------------------------------|--------------------------------------------------------------------------------------------------------------------------------|-----------------------------------|----------------------------|--------------------------|
| The Rotterdam Study-I           | Version 3<br>Illumina Infinium II HumanHap550 | BeadStudio   | pHWE < 1e-5, call rate<90%, MAF<0.01, Mendelian errors>100, SNPs not in Hapmap or strandedness issues merging with Hapmap | 530,683 | MACH                                                                                                                       | HapMap release 22 (build 36)                                                                                                   | none                              | ProbABEL                   | NA                       |
| Sardinia                        | Affymetrix 500K                               | BRLMM        | MAF < 0.01, non-HapMap, call rate <95%, pHWE<10E-6                                                                        | NA      | 1 step / MACH version 1.0.15                                                                                               | phased CEU haplotypes, HapMap release 22 (build 36)                                                                            | RSQ < 0.3 excluded                |                            | genomic control          |
| MESA                            | Affymetrix 6.0                                | Birdseed     | MAF < 0.01, call rate <95%                                                                                                | 934,940 | genotyped SNPs only were used for this analysis.                                                                           | ---                                                                                                                            | ---                               | R                          | First 10 PCs of Ancestry |
| <b>African American studies</b> |                                               |              |                                                                                                                           |         |                                                                                                                            |                                                                                                                                |                                   |                            |                          |
| JHS                             | Affymetrix 6.0                                | Birdseed     | MAF < 0.01, call rate <95%                                                                                                | 868,969 | MACH version 1.0.16                                                                                                        | Panel of reference haplotypes using HapMap phase II CEU and YRI data (release 22, build 36)                                    |                                   |                            |                          |
| HANDLS                          | Illumina 1M                                   | GenomeStudio | pHWE > 1e-7, missing by haplotype p-values > 1e-7, minor allele frequency > 0.01, and call rate > 95%                     | 907,763 | MACH and miniMac ( <a href="http://www.sph.umich.edu/csg/abecasis/mach/">http://www.sph.umich.edu/csg/abecasis/mach/</a> ) | combined haplotype data for HapMap Phase 2 YRI and CEU samples that includes monomorphic SNPs in either of the two constituent | Excluded RSQ ≤ 0.3 and MAF ≤ 0.01 | PLINK/R – GLM from dosages | 10 PCs                   |

|                             |                   |                         |                                                               |           |                     |                                                                                      |                                                                                         |                                                                    |                                                                                          |
|-----------------------------|-------------------|-------------------------|---------------------------------------------------------------|-----------|---------------------|--------------------------------------------------------------------------------------|-----------------------------------------------------------------------------------------|--------------------------------------------------------------------|------------------------------------------------------------------------------------------|
|                             |                   |                         |                                                               |           |                     | populations (release 22, build 36.3)                                                 |                                                                                         |                                                                    |                                                                                          |
| HUFS                        | Affy 6.0          | Birdseed v2             | MAF < 0.01, call rate < 0.95, pHWE < 0.01                     | 809,465   | MACH version 1.16   | CEU and YRI in 1KG (2010-06 releases)                                                | excluded RSQ< 0.3, call rate < 0.9, MAF < 0.01, HWE < 0.01; 5,396,838 SNPs for analysis | Assuming genetic additive model and association performed in PLINK | First two PCs were used                                                                  |
| ARIC: African-Americans     | Affymetrix 6.0    | Birdseed                | call rate <95%, MAF<1%, pHWE <10e-5                           | 806,416   | Shapeit / Impute v2 | 1000Genomes Phase 1 v3                                                               | none                                                                                    | R, ProbABEL, Plink                                                 | Adjusted for any of the first 10 PC associated with phenotype at p<0.05                  |
| GENOA: African-Americans    | Illumina 1Mi      | BeadStudio for Illumina | call rate <95%, MAF =0, flag for pHWE, MAF =0, flag for pHWE, | 1,613,471 | MACH version 1.0.15 | and for Blacks, combined phased CEU and YRI phenotypes, HapMap release 22 (build 36) | none                                                                                    | dosage accounting for family relatedness                           | NA                                                                                       |
| <b>Asian Indian studies</b> |                   |                         |                                                               |           |                     |                                                                                      |                                                                                         |                                                                    |                                                                                          |
| LOLIPOP_IA610               | Illumina Human610 | BeadStudio              | MAF < 0.01, call rate <95%, pHWE<10E-6                        | 544,390   | IMPUTE2 V2.3.0      | phased CEU+CHB+JPT+YRI haplotypes, HapMap release 22 (build 36)                      | none                                                                                    | snptest was used for association with additive effect              | First five PCs included, also corrected for cohort recruitment time (0/1) and CHD status |



|                  |                           |                 |                                        |         |                |                                                                 |      |                                                       |                         |
|------------------|---------------------------|-----------------|----------------------------------------|---------|----------------|-----------------------------------------------------------------|------|-------------------------------------------------------|-------------------------|
| LOLIPOP_IA317    | Illumina HumanHap30 OK    | BeadStudio      | MAF < 0.01, call rate <95%, pHWE<10E-6 | 245,892 | IMPUTE2 V2.3.0 | phased CEU+CHB+JPT+YRI haplotypes, HapMap release 22 (build 36) | none | snptest was used for association with additive effect | First five PCs included |
| LOLIPOP_IAOmniEE | OmniExpressExome BeadChip | zCall           | MAF < 0.01, call rate <99%, pHWE<10E-6 | 692,266 | IMPUTE2 V2.3.0 | phased CEU+CHB+JPT+YRI haplotypes, HapMap release 22 (build 36) | none | snptest was used for association with additive effect | First five PCs included |
| LOLIPOP_IAP      | Perlegen custom           | Perlegen custom | MAF < 0.01, call rate <95%, pHWE<10E-6 | 170,055 | IMPUTE2 V2.3.0 | phased CEU+CHB+JPT+YRI haplotypes, HapMap release 22 (build 36) | none | snptest was used for association with additive effect | First five PCs included |

**Supplementary Table 5: Imputation quality across studies in SNPs analyzed in stage 1 meta-analysis**

| <b>Study/ SNP</b>      | <b>rs16846053</b> | <b>rs753628</b> | <b>rs12677356</b> | <b>rs10774613</b> | <b>rs17074418</b> | <b>rs9980</b> | <b>rs11662617</b> | <b>rs6565990</b> |
|------------------------|-------------------|-----------------|-------------------|-------------------|-------------------|---------------|-------------------|------------------|
| <b>BLSA</b>            | 0.98              | 0.98            | 0.60              | 1.00              | 0.86              | 0.99          | 1.00              | 0.87             |
| <b>ARIC: Europeans</b> | 0.99              | 0.56            | 1.00              | 1.00              | 0.96              | 0.99          | 0.82              | 0.44             |
| <b>Colaus</b>          | 0.99              | 0.53            | 0.80              | 1.00              | 0.63              | 0.98          | 0.81              | 0.38             |
| <b>FHS</b>             | 1.01              | 0.47            | 0.80              | 1.01              | 0.96              | 0.98          | 0.99              | 0.32             |
| <b>Micros</b>          | 0.98              | 0.99            | 0.57              | 1.00              | 0.45              | 0.92          | 0.62              | 0.78             |
| <b>Genoa</b>           | 0.99              | 0.64            | 0.97              | 0.99              | 0.94              | 0.99          | 0.81              | 0.49             |
| <b>Amish</b>           | 0.97              | 0.64            | 0.42              | 0.99              | 0.62              | 0.97          | 0.81              | 0.39             |
| <b>InCHIANTI</b>       | 0.98              | 0.99            | 0.54              | 0.99              | 0.84              | 0.97          | 0.99              | 0.83             |
| <b>KORAF3</b>          | 0.99              | 0.48            | 0.79              | 0.99              | 0.38              | 0.98          | 0.73              | 0.34             |
| <b>KORAF4</b>          | 0.99              | 0.89            | 0.99              | 1.00              | 0.97              | 0.97          | 0.74              | 0.38             |
| <b>MrOS</b>            | 0.99              | 0.98            | 0.86              | 0.99              | 1.00              | 1.00          | 0.99              | 0.92             |
| <b>Rotterdam</b>       | 0.98              | NA              | 0.62              | NA                | 0.87              | NA            | 0.99              | NA               |
| <b>LOLIPOP_EW610</b>   | 0.96              | 1.00            | 0.60              | 1.00              | 0.84              | 0.98          | 1.00              | 0.82             |
| <b>LOLIPOP_EWA</b>     | 0.97              | 0.41            | 0.44              | 0.99              | 0.55              | 0.96          | 0.80              | 0.21             |
| <b>LOLIPOP_EWP</b>     | 0.76              | 0.02            | 0.45              | 0.71              | 0.81              | 0.98          | 0.21              | 0.69             |
| <b>LURIC</b>           | 0.99              | 0.96            | 1.00              | 1.00              | 0.99              | 0.98          | 0.82              | 0.43             |
| <b>OGP</b>             | 0.99              | 0.40            | 0.58              | NA                | 0.63              | 0.95          | 0.72              | 0.30             |
| <b>OGPTalana</b>       | 0.95              | 0.64            | 0.32              | NA                | 0.48              | 0.96          | 0.84              | 0.40             |
| <b>SHIP</b>            | 0.98              | 0.62            | 0.84              | 0.78              | 0.97              | 0.99          | 0.85              | 0.42             |
| <b>SHIP-TREND</b>      | 0.96              | 0.85            | 0.80              | 0.82              | 0.97              | 0.99          | 0.98              | 0.89             |
| <b>Min</b>             | <b>0.76</b>       | <b>0.02</b>     | <b>0.32</b>       | <b>0.71</b>       | <b>0.38</b>       | <b>0.92</b>   | <b>0.21</b>       | <b>0.21</b>      |
| <b>Max</b>             | <b>1.01</b>       | <b>1.00</b>     | <b>1.00</b>       | <b>1.01</b>       | <b>1.00</b>       | <b>1.00</b>   | <b>1.00</b>       | <b>0.92</b>      |
| <b>Median</b>          | <b>0.98</b>       | <b>0.64</b>     | <b>0.70</b>       | <b>0.99</b>       | <b>0.85</b>       | <b>0.98</b>   | <b>0.82</b>       | <b>0.43</b>      |

**Supplementary Table 6: SNPs associated with serum sodium in stage 1 GWAS meta-analysis of subjects with European Ancestry with  $p < 10^{-5}$**

| SNP ID     | Chromosome | Position    | Allele1/<br>Allele2 | frequency<br>of Allele 1 | Effect of<br>Allele 1 | SE   | Direction of effect per<br>study | P-value  | I2<br>(%) | Het p<br>val | Sample<br>Size |
|------------|------------|-------------|---------------------|--------------------------|-----------------------|------|----------------------------------|----------|-----------|--------------|----------------|
| rs16845742 | 2          | 161,835,280 | t/g                 | 0.92                     | -0.06                 | 0.01 | -----+-----+-----                | 2.56E-06 | 48        | 0.01         | 45,887         |
| rs2194732  | 2          | 161,997,402 | a/g                 | 0.10                     | 0.06                  | 0.01 | +++++-----+-----                 | 2.48E-07 | 26.6      | 0.13         | 45,887         |
| rs16845851 | 2          | 162,003,869 | a/c                 | 0.90                     | -0.06                 | 0.01 | -----+-----+-----                | 2.41E-07 | 25.1      | 0.14         | 45,887         |
| rs12469052 | 2          | 162,027,599 | t/c                 | 0.90                     | -0.06                 | 0.01 | -----+-----+-----                | 3.05E-07 | 24.7      | 0.15         | 45,887         |
| rs12467662 | 2          | 162,095,030 | a/g                 | 0.10                     | 0.06                  | 0.01 | +++++-----+-----                 | 3.66E-07 | 23.5      | 0.16         | 45,887         |
| rs2020027  | 2          | 162,134,124 | a/g                 | 0.10                     | 0.06                  | 0.01 | +++++-----+-----                 | 3.17E-07 | 21.6      | 0.18         | 45,850         |
| rs12469302 | 2          | 162,142,077 | t/g                 | 0.10                     | 0.06                  | 0.01 | +++++-----+-----                 | 4.09E-07 | 21.6      | 0.18         | 45,887         |
| rs1515182  | 2          | 162,145,180 | a/g                 | 0.90                     | -0.06                 | 0.01 | -----+?-----+-----               | 2.57E-06 | 23.2      | 0.17         | 41,978         |
| rs12464282 | 2          | 162,157,101 | t/c                 | 0.10                     | 0.06                  | 0.01 | +++++-----+-----                 | 6.65E-07 | 16.6      | 0.24         | 45,887         |
| rs2175142  | 2          | 162,158,370 | t/c                 | 0.90                     | -0.06                 | 0.01 | -----+-----+-----                | 7.14E-07 | 16.2      | 0.25         | 45,887         |
| rs2389549  | 2          | 162,170,455 | t/c                 | 0.90                     | -0.06                 | 0.01 | -----+-----+-----                | 4.58E-07 | 4.4       | 0.40         | 45,837         |
| rs1567420  | 2          | 162,183,847 | t/c                 | 0.90                     | -0.06                 | 0.01 | -----+-----+-----                | 1.01E-06 | 17.2      | 0.24         | 45,883         |
| rs1567421  | 2          | 162,183,863 | t/g                 | 0.10                     | 0.06                  | 0.01 | +++++-----+-----                 | 1.43E-06 | 24.2      | 0.15         | 45,881         |
| rs16845945 | 2          | 162,188,930 | t/c                 | 0.10                     | 0.06                  | 0.01 | +++++-----+-----                 | 9.06E-07 | 17.4      | 0.23         | 45,887         |
| rs12473088 | 2          | 162,193,319 | a/g                 | 0.90                     | -0.06                 | 0.01 | -----+-----+-----                | 7.58E-07 | 16.7      | 0.24         | 45,887         |
| rs16845997 | 2          | 162,229,292 | a/c                 | 0.10                     | 0.06                  | 0.01 | +++++-----+-----                 | 5.27E-07 | 7.3       | 0.36         | 45,887         |
| rs12467042 | 2          | 162,235,217 | a/g                 | 0.10                     | 0.06                  | 0.01 | +++++-----+-----                 | 4.73E-07 | 3.9       | 0.41         | 45,887         |
| rs16846026 | 2          | 162,245,937 | t/c                 | 0.90                     | -0.06                 | 0.01 | -----+-----+-----                | 4.06E-07 | 3.1       | 0.42         | 45,887         |
| rs12467279 | 2          | 162,252,990 | a/g                 | 0.90                     | -0.06                 | 0.01 | -----+-----+-----                | 3.66E-07 | 1         | 0.44         | 45,887         |
| rs1399650  | 2          | 162,259,964 | a/g                 | 0.84                     | -0.04                 | 0.01 | ---+---+0-----+---               | 6.78E-06 | 12        | 0.30         | 45,887         |
| rs1515186  | 2          | 162,264,606 | a/g                 | 0.84                     | -0.04                 | 0.01 | ---+---+-----+---                | 4.82E-06 | 10.8      | 0.32         | 45,887         |
| rs1515185  | 2          | 162,267,672 | t/c                 | 0.16                     | 0.05                  | 0.01 | +++-----+-----+---               | 2.92E-06 | 4.9       | 0.39         | 45,887         |
| rs13417851 | 2          | 162,268,165 | t/g                 | 0.90                     | -0.06                 | 0.01 | -----+?-----+-----               | 1.71E-06 | 1.1       | 0.44         | 41,978         |
| rs16846047 | 2          | 162,270,192 | t/c                 | 0.90                     | -0.06                 | 0.01 | -----+-----+-----                | 2.21E-07 | 0         | 0.58         | 45,861         |
| rs13014399 | 2          | 162,271,397 | c/g                 | 0.16                     | 0.05                  | 0.01 | +++-----+-----+---               | 2.96E-06 | 5.2       | 0.39         | 45,887         |
| rs16846050 | 2          | 162,271,799 | a/g                 | 0.10                     | 0.06                  | 0.01 | +++++-----+-----                 | 2.44E-07 | 0         | 0.49         | 45,887         |
| rs16846053 | 2          | 162,274,291 | t/g                 | 0.90                     | -0.06                 | 0.01 | -----+-----+-----                | 1.86E-07 | 2.7       | 0.42         | 45,887         |
| rs12476631 | 2          | 162,275,182 | t/c                 | 0.90                     | -0.06                 | 0.01 | -----+-----+-----                | 3.17E-07 | 0         | 0.48         | 45,884         |

|            |    |             |     |      |       |      |                      |          |      |      |        |
|------------|----|-------------|-----|------|-------|------|----------------------|----------|------|------|--------|
| rs16846064 | 2  | 162,277,187 | c/g | 0.10 | 0.06  | 0.01 | +++++++-----+-----   | 2.59E-07 | 0    | 0.50 | 45,887 |
| rs6752007  | 2  | 162,277,219 | t/c | 0.83 | -0.05 | 0.01 | -----+---?---+-----  | 8.03E-06 | 12.8 | 0.30 | 42,472 |
| rs12474713 | 2  | 162,277,587 | a/c | 0.10 | 0.06  | 0.01 | +++++++-----+-----   | 2.58E-07 | 0    | 0.52 | 45,887 |
| rs7591103  | 2  | 162,286,970 | a/g | 0.16 | 0.05  | 0.01 | +++-----+?+-----+    | 4.52E-06 | 9.3  | 0.34 | 42,472 |
| rs3903713  | 2  | 162,288,630 | a/c | 0.84 | -0.05 | 0.01 | -----+-----+-----    | 1.40E-06 | 5.1  | 0.39 | 45,887 |
| rs2322649  | 2  | 162,289,182 | a/g | 0.84 | -0.05 | 0.01 | -----+-----+-----    | 1.51E-06 | 4.5  | 0.40 | 45,887 |
| rs3849341  | 2  | 162,289,276 | t/c | 0.16 | 0.05  | 0.01 | +++-----+-----+----- | 1.53E-06 | 4.2  | 0.40 | 45,887 |
| rs4664048  | 2  | 162,290,500 | a/t | 0.16 | 0.05  | 0.01 | +++-----+-----+----- | 1.55E-06 | 3.7  | 0.41 | 45,887 |
| rs16846073 | 2  | 162,294,794 | c/g | 0.89 | -0.05 | 0.01 | -----+-----+-----    | 4.94E-06 | 0    | 0.55 | 45,886 |
| rs1006427  | 2  | 162,300,574 | t/c | 0.89 | -0.05 | 0.01 | -----+---?---+-----  | 9.59E-06 | 0    | 0.50 | 42,472 |
| rs12470743 | 2  | 162,319,448 | a/g | 0.11 | 0.05  | 0.01 | +++++++-----+-----   | 1.60E-06 | 0    | 0.50 | 45,887 |
| rs1449641  | 2  | 162,327,813 | t/c | 0.89 | -0.05 | 0.01 | -----+-----+-----    | 1.85E-06 | 0    | 0.50 | 45,887 |
| rs753628   | 3  | 196,040,762 | a/g | 0.37 | 0.04  | 0.01 | +++++++-----+?+----- | 1.75E-06 | 0    | 0.84 | 42,472 |
| rs1038078  | 5  | 122,309,550 | t/c | 0.11 | 0.05  | 0.01 | -++++-----+?+-----   | 9.24E-06 | 4.2  | 0.40 | 42,391 |
| rs4731700  | 7  | 130,047,082 | a/g | 0.94 | -0.07 | 0.02 | -----+---?---+-----  | 9.81E-06 | 24   | 0.16 | 41,978 |
| rs3857859  | 7  | 130,051,846 | a/g | 0.06 | 0.07  | 0.01 | ++++-+-----+-----    | 9.47E-06 | 14.7 | 0.27 | 45,884 |
| rs12677356 | 8  | 23,696,389  | t/g | 0.05 | 0.09  | 0.02 | ++++-+-----+-----    | 1.41E-06 | 0    | 0.60 | 45,887 |
| rs7968960  | 12 | 109,910,998 | a/c | 0.64 | 0.04  | 0.01 | +++-----+?+-----     | 9.42E-06 | 26.8 | 0.13 | 42,472 |
| rs10774613 | 12 | 110,030,548 | t/c | 0.57 | 0.03  | 0.01 | +++-----+?+-----     | 3.77E-06 | 26.8 | 0.13 | 42,459 |
| rs1023104  | 13 | 29,675,301  | t/c | 0.08 | -0.07 | 0.01 | +-----+---?---+----- | 5.44E-06 | 0    | 0.48 | 42,472 |
| rs17074418 | 13 | 29,675,855  | t/c | 0.92 | 0.07  | 0.01 | -++++-----+-----     | 1.77E-06 | 0    | 0.52 | 45,887 |
| rs17074420 | 13 | 29,678,602  | t/c | 0.07 | -0.07 | 0.02 | +-----+-----+-----   | 4.20E-06 | 0    | 0.60 | 45,887 |
| rs9514320  | 13 | 104,265,624 | a/g | 0.25 | -0.04 | 0.01 | +-----+---?---+----- | 6.27E-06 | 0    | 0.81 | 42,442 |
| rs4525351  | 13 | 104,268,246 | a/c | 0.75 | 0.04  | 0.01 | -++++-----+-----     | 7.82E-06 | 0    | 0.90 | 45,887 |
| rs3751544  | 15 | 35,175,263  | t/c | 0.50 | 0.04  | 0.01 | +++++++-----+?+----- | 7.23E-06 | 0    | 0.67 | 39,739 |
| rs7200764  | 16 | 68,106,289  | t/c | 0.13 | 0.05  | 0.01 | +++++++-----+?+----- | 8.31E-06 | 8.5  | 0.35 | 42,472 |
| rs4783720  | 16 | 68,117,197  | t/c | 0.87 | -0.05 | 0.01 | -----+-----+-----    | 9.00E-06 | 21.3 | 0.19 | 45,882 |
| rs7193778  | 16 | 68,121,391  | t/c | 0.87 | -0.05 | 0.01 | -----+---?---+-----  | 4.49E-06 | 22.2 | 0.18 | 42,451 |
| rs1549287  | 16 | 68,147,867  | a/g | 0.14 | 0.05  | 0.01 | +++++++-----+-----   | 8.12E-06 | 30   | 0.10 | 45,887 |
| rs244422   | 16 | 68,175,014  | c/g | 0.13 | 0.05  | 0.01 | +++++++-----+-----   | 5.61E-06 | 27.6 | 0.12 | 45,887 |
| rs39999    | 16 | 68,211,197  | c/g | 0.14 | 0.05  | 0.01 | +++++++-----+-----   | 7.83E-06 | 31.5 | 0.08 | 45,881 |
| rs9980     | 16 | 68,294,969  | c/g | 0.86 | -0.05 | 0.01 | -----+---?---+-----  | 2.40E-06 | 30   | 0.10 | 42,472 |
| rs17299478 | 16 | 68,333,001  | t/c | 0.15 | 0.05  | 0.01 | +++++++-----+-----   | 5.23E-06 | 43.6 | 0.02 | 45,883 |

|            |    |            |     |      |       |      |                          |          |      |      |        |
|------------|----|------------|-----|------|-------|------|--------------------------|----------|------|------|--------|
| rs29062    | 18 | 9,955,338  | a/g | 0.58 | -0.03 | 0.01 | -----+-----+?--+-----    | 8.85E-06 | 0    | 0.70 | 39,738 |
| rs29061    | 18 | 9,955,431  | t/c | 0.58 | -0.03 | 0.01 | -----+-----+?--+-----    | 8.42E-06 | 0    | 0.70 | 39,738 |
| rs11662617 | 18 | 13,243,598 | a/g | 0.48 | -0.04 | 0.01 | +--+-----+-----?--+----- | 2.02E-06 | 27.8 | 0.12 | 39,739 |
| rs7505177  | 18 | 73,349,880 | t/g | 0.40 | 0.04  | 0.01 | +++++++-----+?++-----    | 8.90E-06 | 0    | 0.68 | 36,324 |
| rs6565990  | 18 | 73,350,561 | t/g | 0.49 | 0.05  | 0.01 | ++-+++-+--+?++-+-+--+    | 1.51E-06 | 0    | 0.65 | 36,324 |

The effect directions in the column "direction" correspond sequentially to these studies: BLSA, ARIC:Europeans, COLAUS, FHS, MICROS, GENOA:Europeans, Amish studies, InCHIANTI, KORA F3, KORA F4, MrOS, Rotterdam, SARDINIA, LOLIPOP\_EW610, LOLIPOP\_EWA, LOLIPOP\_EWP, LURIC, Ogliastra Genetic Park study, Ogliastra Genetic Park Talana study, SHIP and SHIP-TREND.

**Supplementary Table 7: Known Gene Biology of Genes located in replicated loci**

| <b>Gene symbol</b> | <b>Gene name</b>                                   | <b>Gene Biology</b>                                                                                                                                                                                                                                                                                                                                                                                                                                                                                                                           |
|--------------------|----------------------------------------------------|-----------------------------------------------------------------------------------------------------------------------------------------------------------------------------------------------------------------------------------------------------------------------------------------------------------------------------------------------------------------------------------------------------------------------------------------------------------------------------------------------------------------------------------------------|
| <i>NOB1</i>        | NIN1/RPN12 binding protein 1 homolog               | <i>NOB1</i> is a nuclease involved in pre-rRNA processing <sup>41</sup> ; <i>NOB1</i> is an oncogene for development of glioma <sup>42</sup> . No known function in sodium or water balance                                                                                                                                                                                                                                                                                                                                                   |
| <i>NQO1</i>        | NAD(P)H dehydrogenase, quinone 1                   | NQO1 encodes a cytoplasmic 2-electron reductase. Polymorphisms in this gene have been associated with bladder cancer <sup>43,44</sup> . No known function in sodium or water balance.                                                                                                                                                                                                                                                                                                                                                         |
| <i>WWP2</i>        | WW domain containing E3 ubiquitin protein ligase 2 | WWP2 encodes a member of the Nedd4 family of E3 ligases, relevant in protein ubiquitination and cell cycle regulation. Gene knockout experiments suggest a role in chondrogenesis <sup>45</sup> . No known function in sodium or water balance.                                                                                                                                                                                                                                                                                               |
| <i>CLEC18A</i>     | C-type lectin domain family 18 member A            | The gene product is a secreted protein that binds to carbohydrates in the presence of calcium and may be involved in cell adhesion and immune responses (NCBI). No known function in sodium or water balance.                                                                                                                                                                                                                                                                                                                                 |
| <i>PSMD14</i>      | proteasome 26S subunit, non-ATPase 14              | PSDM14 encodes a proteasome which is part of a multiprotein complex catalyzing the degradatation of ubiquinated intracellular proteins; knockdown induces cell cycle arrest and senescence <sup>46</sup> . No known function in sodium or water balance.                                                                                                                                                                                                                                                                                      |
| <i>TBR1</i>        | T-box, brain 1                                     | T-box genes encode transcription factors involved in the regulation of developmental processes. Mutations in this gene have been related to sporadic autism <sup>47</sup> . No known function in sodium or water balance.                                                                                                                                                                                                                                                                                                                     |
| <i>DPP4</i>        | dipeptidyl-peptidase 4                             | The gene product is a serine exopeptidase that cleaves X-proline dipeptides from the N-terminus of polypeptides, and is a drug target in the treatment of hyperglycemia of type 2 diabetes. DPP4 circulates in plasma and is expressed in the kidney's proximal tubule, the podocyte, endothelium and the mesangium. The circulating form degrades the incretin hormone glucagon-like receptor 1 (GLP-1) which lowers blood glucose by enhancing insulin secretion in response to a meal. DPP4 inhibitors induce natriuresis <sup>48,49</sup> |

**Supplementary Table 8: SNPs associated with serum sodium in stage 1 GWAS meta-analysis of subjects with African Ancestry with  $p < 10^{-5}$**

| SNP ID     | Chromosome | Position    | Allele1/<br>Allele2 | frequency<br>of Allele 1 | Effect of<br>Allele 1 | SE    | Direction | P-value  | I2<br>(%) | Het p<br>val | Total<br>Sample<br>Size |
|------------|------------|-------------|---------------------|--------------------------|-----------------------|-------|-----------|----------|-----------|--------------|-------------------------|
| rs7580868  | 2          | 43,966,807  | a/g                 | 0.11                     | 0.15                  | 0.034 | ?++++     | 1.14E-05 | 0         | 0.52         | 6,234                   |
| rs6715448  | 2          | 81,948,077  | t/c                 | 0.29                     | -0.10                 | 0.020 | -----     | 3.04E-06 | 0         | 0.99         | 7,200                   |
| rs16865212 | 3          | 176,062,514 | a/g                 | 0.32                     | 0.09                  | 0.019 | -++++     | 8.34E-06 | 0         | 0.65         | 7,208                   |
| rs10513723 | 3          | 176,062,702 | a/g                 | 0.32                     | 0.09                  | 0.019 | -++++     | 7.86E-06 | 0         | 0.71         | 7,213                   |
| rs16865252 | 3          | 176,065,417 | a/g                 | 0.28                     | 0.09                  | 0.020 | +++++     | 6.76E-06 | 0         | 0.99         | 7,208                   |
| rs16865319 | 3          | 176,070,161 | a/g                 | 0.28                     | 0.09                  | 0.020 | ?++++     | 1.00E-05 | 0         | 0.92         | 6,234                   |
| rs7640081  | 3          | 197,389,507 | t/c                 | 0.11                     | -0.15                 | 0.033 | ?-----    | 4.14E-06 | 0         | 0.48         | 6,234                   |
| rs6941732  | 6          | 51,648,081  | t/c                 | 0.75                     | 0.10                  | 0.022 | +++++     | 5.26E-06 | 0         | 0.72         | 7,215                   |
| rs10732902 | 10         | 126,687,810 | t/c                 | 0.90                     | -0.15                 | 0.033 | -----     | 5.72E-06 | 0         | 0.52         | 7,170                   |
| rs933922   | 11         | 12,534,867  | a/g                 | 0.82                     | -0.11                 | 0.025 | +-----    | 6.96E-06 | 0         | 0.51         | 7,177                   |
| rs4622362  | 13         | 22,045,448  | a/g                 | 0.04                     | -0.28                 | 0.057 | ?-?-?     | 9.64E-07 | 34        | 0.22         | 4,384                   |
| rs12428841 | 13         | 57,289,492  | t/c                 | 0.91                     | 0.15                  | 0.033 | +++++     | 9.77E-06 | 0         | 0.80         | 7,171                   |
| rs2039659  | 13         | 85,136,351  | a/g                 | 0.54                     | 0.08                  | 0.018 | +++++     | 8.31E-06 | 32        | 0.21         | 7,205                   |
| rs2039658  | 13         | 85,136,382  | t/c                 | 0.46                     | -0.08                 | 0.018 | -----     | 8.38E-06 | 32        | 0.21         | 7,205                   |
| rs1538064  | 13         | 85,138,490  | a/c                 | 0.54                     | -0.08                 | 0.019 | -----     | 1.07E-05 | 18        | 0.30         | 7,205                   |
| rs1538063  | 13         | 85,138,591  | a/g                 | 0.46                     | -0.08                 | 0.018 | -----     | 9.10E-06 | 31        | 0.22         | 7,205                   |
| rs1538061  | 13         | 85,138,704  | a/c                 | 0.54                     | -0.08                 | 0.019 | -----     | 1.16E-05 | 18        | 0.30         | 7,205                   |
| rs9547306  | 13         | 85,145,100  | t/c                 | 0.54                     | -0.08                 | 0.019 | -----     | 1.22E-05 | 20        | 0.29         | 7,145                   |
| rs8033133  | 15         | 22,901,567  | a/g                 | 0.34                     | 0.09                  | 0.019 | +++++     | 8.93E-06 | 0         | 0.78         | 7,148                   |

The effect directions in the column "direction" correspond sequentially to these studies: HUFS, ARIC JHS, GENOA and HANDLS.

**Supplementary Table 9: SNPs associated with serum sodium in stage 1 GWAS meta-analysis of subjects with Asian Ancestry with  $p < 10^{-5}$**

| MarkerName | Chromosome | Position    | Allele1/<br>Allele2 | frequency<br>of Allele 1 | Effect of<br>Allele 1 | SE     | Direction | P-value  | I2<br>(%) | Het p<br>val | Total<br>Sample<br>Size |
|------------|------------|-------------|---------------------|--------------------------|-----------------------|--------|-----------|----------|-----------|--------------|-------------------------|
| rs6739015  | 2          | 85,608,868  | a/g                 | 0.62                     | -0.07                 | 0.0158 | ---+      | 3.46E-06 | 60        | 0.06         | 8,760                   |
| rs2044474  | 2          | 85,612,301  | a/g                 | 0.38                     | 0.07                  | 0.0158 | +++-      | 3.35E-06 | 60        | 0.06         | 8,760                   |
| rs17026396 | 2          | 85,612,638  | t/c                 | 0.62                     | -0.07                 | 0.0158 | ---+      | 3.34E-06 | 60        | 0.06         | 8,760                   |
| rs10198569 | 2          | 85,647,926  | a/g                 | 0.62                     | -0.07                 | 0.0158 | ---+      | 3.87E-06 | 59        | 0.06         | 8,760                   |
| rs3770098  | 2          | 85,658,878  | a/c                 | 0.39                     | 0.07                  | 0.0157 | +++-      | 4.48E-06 | 54        | 0.09         | 8,760                   |
| rs1009     | 2          | 85,662,248  | a/g                 | 0.61                     | -0.07                 | 0.0158 | ---+      | 4.48E-06 | 57        | 0.07         | 8,760                   |
| rs1058588  | 2          | 85,662,382  | t/c                 | 0.38                     | 0.07                  | 0.0158 | +++-      | 5.18E-06 | 52        | 0.10         | 8,760                   |
| rs1010     | 2          | 85,662,493  | t/c                 | 0.61                     | -0.07                 | 0.0158 | ---+      | 4.60E-06 | 56        | 0.08         | 8,760                   |
| rs2970963  | 2          | 215,680,305 | t/g                 | 0.97                     | 0.32                  | 0.0719 | +++-      | 6.44E-06 | 43        | 0.16         | 8,760                   |
| rs13126694 | 4          | 159,318,234 | a/g                 | 0.63                     | 0.08                  | 0.0170 | ++++      | 9.49E-06 | 0         | 0.73         | 8,759                   |
| rs12518453 | 5          | 163,580,929 | a/c                 | 0.97                     | 0.39                  | 0.0765 | ++++      | 4.25E-07 | 0         | 0.44         | 8,760                   |
| rs215970   | 6          | 84,770,855  | a/c                 | 0.97                     | 0.36                  | 0.0759 | +++-      | 2.22E-06 | 29        | 0.24         | 8,760                   |
| rs6930752  | 6          | 101,946,584 | a/c                 | 0.64                     | 0.08                  | 0.0170 | ++++      | 8.97E-06 | 0         | 0.80         | 8,759                   |
| rs12663042 | 6          | 135,931,498 | a/g                 | 0.02                     | -0.45                 | 0.0995 | ----      | 7.24E-06 | 8         | 0.35         | 8,760                   |
| rs3923547  | 7          | 52,952,901  | a/t                 | 0.06                     | 0.20                  | 0.0455 | ++++      | 8.69E-06 | 16        | 0.31         | 8,760                   |
| rs744359   | 8          | 144,539,581 | t/c                 | 0.83                     | -0.14                 | 0.0306 | ----      | 4.80E-06 | 0         | 0.85         | 8,759                   |
| rs12261068 | 10         | 80,289,142  | a/g                 | 0.98                     | 0.88                  | 0.1792 | +-+       | 9.16E-07 | 51        | 0.10         | 8,760                   |
| rs1468069  | 10         | 98,978,749  | a/c                 | 0.46                     | 0.08                  | 0.0153 | ++++      | 6.30E-07 | 0         | 0.55         | 8,760                   |
| rs2297987  | 10         | 98,979,444  | a/g                 | 0.46                     | 0.08                  | 0.0153 | ++++      | 5.58E-07 | 0         | 0.56         | 8,760                   |
| rs10882884 | 10         | 99,015,601  | a/t                 | 0.53                     | -0.07                 | 0.0154 | ----      | 1.22E-06 | 0         | 0.59         | 8,760                   |
| rs10882889 | 10         | 99,035,880  | a/g                 | 0.45                     | 0.08                  | 0.0154 | ++++      | 5.22E-07 | 0         | 0.47         | 8,760                   |
| rs16937173 | 11         | 19,731,568  | t/g                 | 0.02                     | -0.67                 | 0.1486 | ----      | 5.82E-06 | 16        | 0.31         | 8,760                   |
| rs7306977  | 12         | 8,379,556   | a/g                 | 0.80                     | 0.14                  | 0.0296 | +-+       | 1.39E-06 | 0         | 0.65         | 8,760                   |
| rs4237947  | 12         | 14,281,899  | a/g                 | 0.97                     | 0.38                  | 0.0790 | ++++      | 1.37E-06 | 53        | 0.09         | 8,760                   |
| rs1484224  | 15         | 78,886,028  | t/g                 | 0.01                     | -0.66                 | 0.1447 | ---+      | 5.06E-06 | 0         | 0.62         | 8,760                   |
| rs7187566  | 16         | 79,706,943  | a/g                 | 0.99                     | 1.17                  | 0.2526 | +--+      | 3.76E-06 | 31        | 0.23         | 8,760                   |
| rs2715824  | 17         | 65,023,464  | a/t                 | 0.49                     | 0.07                  | 0.0157 | ++++      | 8.97E-06 | 0         | 0.81         | 8,759                   |
| rs11663316 | 18         | 9,017,914   | a/t                 | 0.19                     | 0.11                  | 0.0253 | ++++      | 5.54E-06 | 0         | 0.70         | 8,759                   |
| rs6506633  | 18         | 9,019,580   | a/g                 | 0.76                     | -0.11                 | 0.0234 | ----      | 7.31E-06 | 0         | 0.63         | 8,759                   |



|            |    |            |     |      |       |        |      |          |    |      |       |
|------------|----|------------|-----|------|-------|--------|------|----------|----|------|-------|
| rs11152056 | 18 | 53,861,176 | c/g | 0.03 | -0.65 | 0.1412 | ---- | 3.80E-06 | 15 | 0.32 | 8,759 |
| rs1119598  | 19 | 33,540,622 | t/c | 0.97 | 0.24  | 0.0553 | +++- | 9.41E-06 | 20 | 0.29 | 8,760 |
| rs7286683  | 22 | 42,076,650 | t/c | 0.01 | 1.18  | 0.2480 | +--+ | 1.92E-06 | 50 | 0.11 | 8,760 |

The effect directions in the column "direction" correspond sequentially to these studies: LOLIPOP\_IA317, LOLIPOP\_IA610, LOLIPOP\_IAP and LOLIPOP\_OmniEE

## References for Supplementary Tables

1. Mitchell, BD, McArdle, PF, Shen, H, Rampersaud, E, Pollin, TI, Bielak, LF, Jaquish, C, Douglas, JA, Roy-Gagnon, MH, Sack, P, Naglieri, R, Hines, S, Horenstein, RB, Chang, YP, Post, W, Ryan, KA, Brereton, NH, Pakyz, RE, Sorkin, J, Damcott, CM, O'Connell, JR, Mangano, C, Corretti, M, Vogel, R, Herzog, W, Weir, MR, Peyser, PA, Shuldiner, AR: The genetic response to short-term interventions affecting cardiovascular function: rationale and design of the Heredity and Phenotype Intervention (HAPI) Heart Study. *Am Heart J*, 155: 823-828, 2008.
2. Rampersaud, E, Bielak, LF, Parsa, A, Shen, H, Post, W, Ryan, KA, Donnelly, P, Rumberger, JA, Sheedy, PF, 2nd, Peyser, PA, Shuldiner, AR, Mitchell, BD: The association of coronary artery calcification and carotid artery intima-media thickness with distinct, traditional coronary artery disease risk factors in asymptomatic adults. *Am J Epidemiol*, 168: 1016-1023, 2008.
3. The Atherosclerosis Risk in Communities (ARIC) Study: design and objectives. The ARIC investigators. *Am J Epidemiol*, 129: 687-702, 1989.
4. Lindeman, RD, Tobin, JD, Shock, NW: Association between blood pressure and the rate of decline in renal function with age. *Kidney Int*, 26: 861-868, 1984.
5. Meyer, TE, Verwoert, GC, Hwang, SJ, Glazer, NL, Smith, AV, van Rooij, FJ, Ehret, GB, Boerwinkle, E, Felix, JF, Leak, TS, Harris, TB, Yang, Q, Dehghan, A, Aspelund, T, Katz, R, Homuth, G, Kocher, T, Rettig, R, Ried, JS, Gieger, C, Prucha, H, Pfeufer, A, Meitinger, T, Coresh, J, Hofman, A, Sarnak, MJ, Chen, YD, Uitterlinden, AG, Chakravarti, A, Psaty, BM, van Duijn, CM, Kao, WH, Witteman, JC, Gudnason, V, Siscovick, DS, Fox, CS, Kottgen, A, Genetic Factors for Osteoporosis, C, Meta Analysis of, G, Insulin Related Traits, C: Genome-wide association studies of serum magnesium, potassium, and sodium concentrations identify six Loci influencing serum magnesium levels. *PLoS Genet*, 6, 2010.
6. Firmann, M, Mayor, V, Vidal, PM, Bochud, M, Pecoud, A, Hayoz, D, Paccaud, F, Preisig, M, Song, KS, Yuan, X, Danoff, TM, Stirnadel, HA, Waterworth, D, Mooser, V, Waeber, G, Vollenweider, P: The CoLaus study: a population-based study to investigate the epidemiology and genetic determinants of cardiovascular risk factors and metabolic syndrome. *BMC Cardiovasc Disord*, 8: 6, 2008.
7. Dorhofer, L, Lammert, A, Krane, V, Gorski, M, Banas, B, Wanner, C, Kramer, BK, Heid, IM, Boger, CA, Group, DS: Study design of DIACORE (DIABetes COHoRtE) - a cohort study of patients with diabetes mellitus type 2. *BMC Med Genet*, 14: 25, 2013.
8. Turner, ST, Kardia, SL, Mosley, TH, Rule, AD, Boerwinkle, E, de Andrade, M: Influence of genomic loci on measures of chronic kidney disease in hypertensive sibships. *J Am Soc Nephrol*, 17: 2048-2055, 2006.
9. Rule, AD, Jacobsen, SJ, Schwartz, GL, Mosley, TH, Scott, CG, Kardia, SL, Boerwinkle, E, Turner, ST: A comparison of serum creatinine-based methods for identifying chronic kidney disease in hypertensive individuals and their siblings. *Am J Hypertens*, 19: 608-614, 2006.
10. Daniels, PR, Kardia, SL, Hanis, CL, Brown, CA, Hutchinson, R, Boerwinkle, E, Turner, ST, Genetic Epidemiology Network of Arteriopathy, s: Familial aggregation of hypertension treatment and control in the Genetic Epidemiology Network of Arteriopathy (GENOA) study. *Am J Med*, 116: 676-681, 2004.
11. Orwoll, E, Blank, JB, Barrett-Connor, E, Cauley, J, Cummings, S, Ensrud, K, Lewis, C, Cawthon, PM, Marcus, R, Marshall, LM, McGowan, J, Phipps, K, Sherman, S, Stefanick, ML, Stone, K: Design and baseline characteristics of the osteoporotic fractures in men (MrOS) study--a large observational study of the determinants of fracture in older men. *Contemp Clin Trials*, 26: 569-585, 2005.
12. Pattaro, C, Marroni, F, Riegler, A, Mascalzoni, D, Pichler, I, Volpato, CB, Dal Cero, U, De Grandi, A, Egger, C, Eisendle, A, Fuchsberger, C, Gogele, M, Pedrotti, S, Pinggera, GK, Stefanov, SA, Vogl, FD, Wiedermann, CJ, Meitinger, T, Pramstaller, PP: The genetic study of three population microisolates in South Tyrol (MICROS): study design and epidemiological perspectives. *BMC Med Genet*, 8: 29, 2007.

13. Marroni, F, Grazio, D, Pattaro, C, Devoto, M, Pramstaller, P: Estimates of genetic and environmental contribution to 43 quantitative traits support sharing of a homogeneous environment in an isolated population from South Tyrol, Italy. *Hum Hered*, 65: 175-182, 2008.
14. Holle, R, Happich, M, Lowel, H, Wichmann, HE, Group, MKS: KORA--a research platform for population based health research. *Gesundheitswesen*, 67 Suppl 1: S19-25, 2005.
15. Wichmann, HE, Gieger, C, Illig, T, Group, MKS: KORA-gen--resource for population genetics, controls and a broad spectrum of disease phenotypes. *Gesundheitswesen*, 67 Suppl 1: S26-30, 2005.
16. Ferrucci, L, Bandinelli, S, Benvenuti, E, Di Iorio, A, Macchi, C, Harris, TB, Guralnik, JM: Subsystems contributing to the decline in ability to walk: bridging the gap between epidemiology and geriatric practice in the InCHIANTI study. *J Am Geriatr Soc*, 48: 1618-1625, 2000.
17. Wain, LV, Verwoert, GC, O'Reilly, PF, Shi, G, Johnson, T, Johnson, AD, Bochud, M, Rice, KM, Henneman, P, Smith, AV, Ehret, GB, Amin, N, Larson, MG, Mooser, V, Hadley, D, Dorr, M, Bis, JC, Aspelund, T, Esko, T, Janssens, AC, Zhao, JH, Heath, S, Laan, M, Fu, J, Pistis, G, Luan, J, Arora, P, Lucas, G, Pirastu, N, Pichler, I, Jackson, AU, Webster, RJ, Zhang, F, Peden, JF, Schmidt, H, Tanaka, T, Campbell, H, Igl, W, Milaneschi, Y, Hottenga, JJ, Vitart, V, Chasman, DI, Trompet, S, Bragg-Gresham, JL, Alizadeh, BZ, Chambers, JC, Guo, X, Lehtimaki, T, Kuhnel, B, Lopez, LM, Polasek, O, Boban, M, Nelson, CP, Morrison, AC, Pihur, V, Ganesh, SK, Hofman, A, Kundu, S, Mattace-Raso, FU, Rivadeneira, F, Sijbrands, EJ, Uitterlinden, AG, Hwang, SJ, Vasana, RS, Wang, TJ, Bergmann, S, Vollenweider, P, Waeber, G, Laitinen, J, Pouta, A, Zitting, P, McArdle, WL, Kroemer, HK, Volker, U, Volzke, H, Glazer, NL, Taylor, KD, Harris, TB, Alavere, H, Haller, T, Keis, A, Tammesoo, ML, Aulchenko, Y, Barroso, I, Khaw, KT, Galan, P, Herberg, S, Lathrop, M, Eyheramendy, S, Org, E, Sober, S, Lu, X, Nolte, IM, Penninx, BW, Corre, T, Masciullo, C, Sala, C, Groop, L, Voight, BF, Melander, O, O'Donnell, CJ, Salomaa, V, d'Adamo, AP, Fabretto, A, Faletra, F, Ulivi, S, Del Greco, F, Facheris, M, Collins, FS, Bergman, RN, Beilby, JP, Hung, J, Musk, AW, Mangino, M, Shin, SY, Soranzo, N, Watkins, H, Goel, A, Hamsten, A, Gider, P, Loitfelder, M, Zeginigg, M, Hernandez, D, Najjar, SS, Navarro, P, Wild, SH, Corsi, AM, Singleton, A, de Geus, EJ, Willemsen, G, Parker, AN, Rose, LM, Buckley, B, Stott, D, Orru, M, Uda, M, LifeLines Cohort, S, van der Klauw, MM, Zhang, W, Li, X, Scott, J, Chen, YD, Burke, GL, Kahonen, M, Viikari, J, Doring, A, Meitinger, T, Davies, G, Starr, JM, Emilsson, V, Plump, A, Lindeman, JH, Hoen, PA, Konig, IR, EchoGen, c, Felix, JF, Clarke, R, Hopewell, JC, Ongen, H, Breteler, M, Debette, S, Destefano, AL, Fornage, M, AortaGen, C, Mitchell, GF, Group, CCHFW, Smith, NL, KidneyGen, c, Holm, H, Stefansson, K, Thorleifsson, G, Thorsteinsdottir, U, consortium, CK, Cardiogenics, c, CardioGram, Samani, NJ, Preuss, M, Rudan, I, Hayward, C, Deary, IJ, Wichmann, HE, Raitakari, OT, Palmas, W, Kooner, JS, Stolk, RP, Jukema, JW, Wright, AF, Boomsma, DI, Bandinelli, S, Gyllenstein, UB, Wilson, JF, Ferrucci, L, Schmidt, R, Farrall, M, Spector, TD, Palmer, LJ, Tuomilehto, J, Pfeufer, A, Gasparini, P, Siscovick, D, Altshuler, D, Loos, RJ, Toniolo, D, Snieder, H, Gieger, C, Meneton, P, Wareham, NJ, Oostra, BA, Metspalu, A, Launer, L, Rettig, R, Strachan, DP, Beckmann, JS, Witteman, JC, Erdmann, J, van Dijk, KW, Boerwinkle, E, Boehnke, M, Ridker, PM, Jarvelin, MR, Chakravarti, A, Abecasis, GR, Gudnason, V, Newton-Cheh, C, Levy, D, Munroe, PB, Psaty, BM, Caulfield, MJ, Rao, DC, Tobin, MD, Elliott, P, van Duijn, CM: Genome-wide association study identifies six new loci influencing pulse pressure and mean arterial pressure. *Nat Genet*, 43: 1005-1011, 2011.
18. International Consortium for Blood Pressure Genome-Wide Association, S, Ehret, GB, Munroe, PB, Rice, KM, Bochud, M, Johnson, AD, Chasman, DI, Smith, AV, Tobin, MD, Verwoert, GC, Hwang, SJ, Pihur, V, Vollenweider, P, O'Reilly, PF, Amin, N, Bragg-Gresham, JL, Teumer, A, Glazer, NL, Launer, L, Zhao, JH, Aulchenko, Y, Heath, S, Sober, S, Parsa, A, Luan, J, Arora, P, Dehghan, A, Zhang, F, Lucas, G, Hicks, AA, Jackson, AU, Peden, JF, Tanaka, T, Wild, SH, Rudan, I, Igl, W, Milaneschi, Y, Parker, AN, Fava, C, Chambers, JC, Fox, ER, Kumari, M, Go, MJ, van der Harst, P, Kao, WH, Sjogren, M, Vinay, DG, Alexander, M, Tabara, Y, Shaw-Hawkins, S, Whincup, PH, Liu, Y, Shi, G, Kuusisto, J, Tayo, B, Seielstad, M, Sim, X, Nguyen, KD, Lehtimaki,

- T, Matullo, G, Wu, Y, Gaunt, TR, Onland-Moret, NC, Cooper, MN, Platou, CG, Org, E, Hardy, R, Dahgam, S, Palmen, J, Vitart, V, Braund, PS, Kuznetsova, T, Uiterwaal, CS, Adeyemo, A, Palmas, W, Campbell, H, Ludwig, B, Tomaszewski, M, Tzoulaki, I, Palmer, ND, consortium, CA, Consortium, CK, KidneyGen, C, EchoGen, c, consortium, C-H, Aspelund, T, Garcia, M, Chang, YP, O'Connell, JR, Steinle, NI, Grobbee, DE, Arking, DE, Kardia, SL, Morrison, AC, Hernandez, D, Najjar, S, McArdle, WL, Hadley, D, Brown, MJ, Connell, JM, Hingorani, AD, Day, IN, Lawlor, DA, Beilby, JP, Lawrence, RW, Clarke, R, Hopewell, JC, Ongen, H, Dreisbach, AW, Li, Y, Young, JH, Bis, JC, Kahonen, M, Viikari, J, Adair, LS, Lee, NR, Chen, MH, Olden, M, Pattaro, C, Bolton, JA, Kottgen, A, Bergmann, S, Mooser, V, Chaturvedi, N, Frayling, TM, Islam, M, Jafar, TH, Erdmann, J, Kulkarni, SR, Bornstein, SR, Grassler, J, Groop, L, Voight, BF, Kettunen, J, Howard, P, Taylor, A, Guarrera, S, Ricceri, F, Emilsson, V, Plump, A, Barroso, I, Khaw, KT, Weder, AB, Hunt, SC, Sun, YV, Bergman, RN, Collins, FS, Bonnycastle, LL, Scott, LJ, Stringham, HM, Peltonen, L, Perola, M, Vartiainen, E, Brand, SM, Staessen, JA, Wang, TJ, Burton, PR, Soler Artigas, M, Dong, Y, Snieder, H, Wang, X, Zhu, H, Lohman, KK, Rudock, ME, Heckbert, SR, Smith, NL, Wiggins, KL, Doumatey, A, Shriner, D, Veldre, G, Viigimaa, M, Kinra, S, Prabhakaran, D, Tripathy, V, Langefeld, CD, Rosengren, A, Thelle, DS, Corsi, AM, Singleton, A, Forrester, T, Hilton, G, McKenzie, CA, Salako, T, Iwai, N, Kita, Y, Ogiwara, T, Ohkubo, T, Okamura, T, Ueshima, H, Umemura, S, Eyheramendy, S, Meitinger, T, Wichmann, HE, Cho, YS, Kim, HL, Lee, JY, Scott, J, Sehmi, JS, Zhang, W, Hedblad, B, Nilsson, P, Smith, GD, Wong, A, Narisu, N, Stancakova, A, Raffel, LJ, Yao, J, Kathiresan, S, O'Donnell, CJ, Schwartz, SM, Ikram, MA, Longstreth, WT, Jr., Mosley, TH, Seshadri, S, Shrine, NR, Wain, LV, Morken, MA, Swift, AJ, Laitinen, J, Prokopenko, I, Zitting, P, Cooper, JA, Humphries, SE, Danesh, J, Rasheed, A, Goel, A, Hamsten, A, Watkins, H, Bakker, SJ, van Gilst, WH, Janipalli, CS, Mani, KR, Yajnik, CS, Hofman, A, Mattace-Raso, FU, Oostra, BA, Demirkan, A, Isaacs, A, Rivadeneira, F, Lakatta, EG, Orru, M, Scuteri, A, Ala-Korpela, M, Kangas, AJ, Lyytikainen, LP, Soininen, P, Tukiainen, T, Wurtz, P, Ong, RT, Dorr, M, Kroemer, HK, Volker, U, Volzke, H, Galan, P, Hercberg, S, Lathrop, M, Zelenika, D, Deloukas, P, Mangino, M, Spector, TD, Zhai, G, Meschia, JF, Nalls, MA, Sharma, P, Terzic, J, Kumar, MV, Denniff, M, Zukowska-Szczechowska, E, Wagenknecht, LE, Fowkes, FG, Charchar, FJ, Schwarz, PE, Hayward, C, Guo, X, Rotimi, C, Bots, ML, Brand, E, Samani, NJ, Polasek, O, Talmud, PJ, Nyberg, F, Kuh, D, Laan, M, Hveem, K, Palmer, LJ, van der Schouw, YT, Casas, JP, Mohlke, KL, Vineis, P, Raitakari, O, Ganesh, SK, Wong, TY, Tai, ES, Cooper, RS, Laakso, M, Rao, DC, Harris, TB, Morris, RW, Dominiczak, AF, Kivimaki, M, Marmot, MG, Miki, T, Saleheen, D, Chandak, GR, Coresh, J, Navis, G, Salomaa, V, Han, BG, Zhu, X, Kooner, JS, Melander, O, Ridker, PM, Bandinelli, S, Gyllenstein, UB, Wright, AF, Wilson, JF, Ferrucci, L, Farrall, M, Tuomilehto, J, Pramstaller, PP, Elosua, R, Soranzo, N, Sijbrands, EJ, Altshuler, D, Loos, RJ, Shuldiner, AR, Gieger, C, Meneton, P, Uitterlinden, AG, Wareham, NJ, Gudnason, V, Rotter, JI, Rettig, R, Uda, M, Strachan, DP, Wittteman, JC, Hartikainen, AL, Beckmann, JS, Boerwinkle, E, Vasani, RS, Boehnke, M, Larson, MG, Jarvelin, MR, Psaty, BM, Abecasis, GR, Chakravarti, A, Elliott, P, van Duijn, CM, Newton-Cheh, C, Levy, D, Caulfield, MJ, Johnson, T: Genetic variants in novel pathways influence blood pressure and cardiovascular disease risk. *Nature*, 478: 103-109, 2011.
19. Yuan, X, Waterworth, D, Perry, JR, Lim, N, Song, K, Chambers, JC, Zhang, W, Vollenweider, P, Stirnadel, H, Johnson, T, Bergmann, S, Beckmann, ND, Li, Y, Ferrucci, L, Melzer, D, Hernandez, D, Singleton, A, Scott, J, Elliott, P, Waeber, G, Cardon, L, Frayling, TM, Kooner, JS, Mooser, V: Population-based genome-wide association studies reveal six loci influencing plasma levels of liver enzymes. *Am J Hum Genet*, 83: 520-528, 2008.
  20. Kooner, JS, Chambers, JC, Aguilar-Salinas, CA, Hinds, DA, Hyde, CL, Warnes, GR, Gomez Perez, FJ, Frazer, KA, Elliott, P, Scott, J, Milos, PM, Cox, DR, Thompson, JF: Genome-wide scan identifies variation in MLXIPL associated with plasma triglycerides. *Nat Genet*, 40: 149-151, 2008.
  21. Winkelmann, BR, Marz, W, Boehm, BO, Zotz, R, Hager, J, Hellstern, P, Senges, J, Group, LS: Rationale and design of the LURIC study--a resource for functional genomics,

- pharmacogenomics and long-term prognosis of cardiovascular disease. *Pharmacogenomics*, 2: S1-73, 2001.
22. Pistis, G, Piras, I, Pirastu, N, Persico, I, Sassu, A, Picciau, A, Prodi, D, Fraumene, C, Mocci, E, Manias, MT, Atzeni, R, Cosso, M, Pirastu, M, Angius, A: High differentiation among eight villages in a secluded area of Sardinia revealed by genome-wide high density SNPs analysis. *PLoS One*, 4: e4654, 2009.
  23. Biino, G, Parati, G, Concas, MP, Adamo, M, Angius, A, Vaccargiu, S, Pirastu, M: Environmental and genetic contribution to hypertension prevalence: data from an epidemiological survey on Sardinian genetic isolates. *PLoS One*, 8: e59612, 2013.
  24. John, U, Greiner, B, Hensel, E, Ludemann, J, Piek, M, Sauer, S, Adam, C, Born, G, Alte, D, Greiser, E, Haertel, U, Hense, HW, Haerting, J, Willich, S, Kessler, C: Study of Health In Pomerania (SHIP): a health examination survey in an east German region: objectives and design. *Soz Präventivmed*, 46: 186-194, 2001.
  25. Volzke, H, Alte, D, Schmidt, CO, Radke, D, Lorbeer, R, Friedrich, N, Aumann, N, Lau, K, Piontek, M, Born, G, Havemann, C, Ittermann, T, Schipf, S, Haring, R, Baumeister, SE, Wallaschofski, H, Nauck, M, Frick, S, Arnold, A, Junger, M, Mayerle, J, Kraft, M, Lerch, MM, Dorr, M, Reffelmann, T, Empen, K, Felix, SB, Obst, A, Koch, B, Glaser, S, Ewert, R, Fietze, I, Penzel, T, Doren, M, Rathmann, W, Haerting, J, Hannemann, M, Ropcke, J, Schminke, U, Jurgens, C, Tost, F, Rettig, R, Kors, JA, Ungerer, S, Hegenscheid, K, Kuhn, JP, Kuhn, J, Hosten, N, Puls, R, Henke, J, Gloger, O, Teumer, A, Homuth, G, Volker, U, Schwahn, C, Holtfreter, B, Polzer, I, Kohlmann, T, Grabe, HJ, Roszkopf, D, Kroemer, HK, Kocher, T, Biffar, R, John, U, Hoffmann, W: Cohort profile: the study of health in Pomerania. *Int J Epidemiol*, 40: 294-307, 2011.
  26. Hofman, A, Brusselle, GG, Darwish Murad, S, van Duijn, CM, Franco, OH, Goedegebure, A, Ikram, MA, Klaver, CC, Nijsten, TE, Peeters, RP, Stricker, BH, Tiemeier, HW, Uitterlinden, AG, Vernooij, MW: The Rotterdam Study: 2016 objectives and design update. *Eur J Epidemiol*, 30: 661-708, 2015.
  27. Pilia, G, Chen, WM, Scuteri, A, Orru, M, Albai, G, Dei, M, Lai, S, Usala, G, Lai, M, Loi, P, Mamei, C, Vacca, L, Deiana, M, Olla, N, Masala, M, Cao, A, Najjar, SS, Terracciano, A, Nedozov, T, Sharov, A, Zonderman, AB, Abecasis, GR, Costa, P, Lakatta, E, Schlessinger, D: Heritability of cardiovascular and personality traits in 6,148 Sardinians. *PLoS Genet*, 2: e132, 2006.
  28. Nieminen, T, Lehtinen, R, Viik, J, Lehtimäki, T, Niemela, K, Nikus, K, Niemi, M, Kallio, J, Koobi, T, Turjanmaa, V, Kahonen, M: The Finnish Cardiovascular Study (FINCAVAS): characterising patients with high risk of cardiovascular morbidity and mortality. *BMC Cardiovasc Disord*, 6: 9, 2006.
  29. Stolk, RP, Rosmalen, JG, Postma, DS, de Boer, RA, Navis, G, Slaets, JP, Ormel, J, Wolffenbuttel, BH: Universal risk factors for multifactorial diseases: LifeLines: a three-generation population-based study. *Eur J Epidemiol*, 23: 67-74, 2008.
  30. Klijs, B, Scholtens, S, Mandemakers, JJ, Snieder, H, Stolk, RP, Smidt, N: Representativeness of the LifeLines Cohort Study. *PLoS One*, 10: e0137203, 2015.
  31. Bild, DE, Bluemke, DA, Burke, GL, Detrano, R, Diez Roux, AV, Folsom, AR, Greenland, P, Jacob, DR, Jr., Kronmal, R, Liu, K, Nelson, JC, O'Leary, D, Saad, MF, Shea, S, Szklo, M, Tracy, RP: Multi-Ethnic Study of Atherosclerosis: objectives and design. *Am J Epidemiol*, 156: 871-881, 2002.
  32. Chambers, JC, Zhang, W, Li, Y, Sehmi, J, Wass, MN, Zabaneh, D, Hoggart, C, Bayele, H, McCarthy, MI, Peltonen, L, Freimer, NB, Srai, SK, Maxwell, PH, Sternberg, MJ, Ruukonen, A, Abecasis, G, Jarvelin, MR, Scott, J, Elliott, P, Kooner, JS: Genome-wide association study identifies variants in Tmprss6 associated with hemoglobin levels. *Nat Genet*, 41: 1170-1172, 2009.
  33. Chambers, JC, Zhang, W, Zabaneh, D, Sehmi, J, Jain, P, McCarthy, MI, Froguel, P, Ruukonen, A, Balding, D, Jarvelin, MR, Scott, J, Elliott, P, Kooner, JS: Common genetic variation near melatonin receptor MTNR1B contributes to raised plasma glucose and increased risk of type 2 diabetes among Indian Asians and European Caucasians. *Diabetes*, 58: 2703-2708, 2009.

34. Chambers, JC, Elliott, P, Zabaneh, D, Zhang, W, Li, Y, Froguel, P, Balding, D, Scott, J, Kooner, JS: Common genetic variation near MC4R is associated with waist circumference and insulin resistance. *Nat Genet*, 40: 716-718, 2008.
35. van der Harst, P, Zhang, W, Mateo Leach, I, Rendon, A, Verweij, N, Sehmi, J, Paul, DS, Elling, U, Allayee, H, Li, X, Radhakrishnan, A, Tan, ST, Voss, K, Weichenberger, CX, Albers, CA, Al-Hussani, A, Asselbergs, FW, Ciullo, M, Danjou, F, Dina, C, Esko, T, Evans, DM, Franke, L, Gogele, M, Hartiala, J, Hersch, M, Holm, H, Hottenga, JJ, Kanoni, S, Kleber, ME, Lagou, V, Langenberg, C, Lopez, LM, Lytikainen, LP, Melander, O, Murgia, F, Nolte, IM, O'Reilly, PF, Padmanabhan, S, Parsa, A, Pirastu, N, Porcu, E, Portas, L, Prokopenko, I, Ried, JS, Shin, SY, Tang, CS, Teumer, A, Traglia, M, Ulivi, S, Westra, HJ, Yang, J, Zhao, JH, Anni, F, Abdellaoui, A, Attwood, A, Balkau, B, Bandinelli, S, Bastardot, F, Benyamin, B, Boehm, BO, Cookson, WO, Das, D, de Bakker, PI, de Boer, RA, de Geus, EJ, de Moor, MH, Dimitriou, M, Domingues, FS, Doring, A, Engstrom, G, Eyjolfsson, GI, Ferrucci, L, Fischer, K, Galanello, R, Garner, SF, Genser, B, Gibson, QD, Girotto, G, Gudbjartsson, DF, Harris, SE, Hartikainen, AL, Hastie, CE, Hedblad, B, Illig, T, Jolley, J, Kahonen, M, Kema, IP, Kemp, JP, Liang, L, Lloyd-Jones, H, Loos, RJ, Meacham, S, Medland, SE, Meisinger, C, Memari, Y, Mihailov, E, Miller, K, Moffatt, MF, Nauck, M, Novatchkova, M, Nutile, T, Olafsson, I, Onundarson, PT, Parracciani, D, Penninx, BW, Perseu, L, Piga, A, Pistis, G, Pouta, A, Puc, U, Raitakari, O, Ring, SM, Robino, A, Ruggiero, D, Ruukonen, A, Saint-Pierre, A, Sala, C, Salumets, A, Sambrook, J, Schepers, H, Schmidt, CO, Sillje, HH, Sladek, R, Smit, JH, Starr, JM, Stephens, J, Sulem, P, Tanaka, T, Thorsteinsdottir, U, Tragante, V, van Gilst, WH, van Pelt, LJ, van Veldhuisen, DJ, Volker, U, Whitfield, JB, Willemsen, G, Winkelmann, BR, Wirnsberger, G, Algra, A, Cucca, F, d'Adamo, AP, Danesh, J, Deary, IJ, Dominiczak, AF, Elliott, P, Fortina, P, Froguel, P, Gasparini, P, Greinacher, A, Hazen, SL, Jarvelin, MR, Khaw, KT, Lehtimaki, T, Maerz, W, Martin, NG, Metspalu, A, Mitchell, BD, Montgomery, GW, Moore, C, Navis, G, Pirastu, M, Pramstaller, PP, Ramirez-Solis, R, Schadt, E, Scott, J, Shuldiner, AR, Smith, GD, Smith, JG, Snieder, H, Sorice, R, Spector, TD, Stefansson, K, Stumvoll, M, Tang, WH, Toniolo, D, Tonjes, A, Visscher, PM, Vollenweider, P, Wareham, NJ, Wolfenbittel, BH, Boomsma, DI, Beckmann, JS, Dedoussis, GV, Deloukas, P, Ferreira, MA, Sanna, S, Uda, M, Hicks, AA, Penninger, JM, Gieger, C, Kooner, JS, Ouweland, WH, Soranzo, N, Chambers, JC: Seventy-five genetic loci influencing the human red blood cell. *Nature*, 492: 369-375, 2012.
36. Lettre, G, Palmer, CD, Young, T, Ejebe, KG, Allayee, H, Benjamin, EJ, Bennett, F, Bowden, DW, Chakravarti, A, Dreisbach, A, Farlow, DN, Folsom, AR, Fornage, M, Forrester, T, Fox, E, Haiman, CA, Hartiala, J, Harris, TB, Hazen, SL, Heckbert, SR, Henderson, BE, Hirschhorn, JN, Keating, BJ, Kritchevsky, SB, Larkin, E, Li, M, Rudock, ME, McKenzie, CA, Meigs, JB, Meng, YA, Mosley, TH, Newman, AB, Newton-Cheh, CH, Paltoo, DN, Papanicolaou, GJ, Patterson, N, Post, WS, Psaty, BM, Qasim, AN, Qu, L, Rader, DJ, Redline, S, Reilly, MP, Reiner, AP, Rich, SS, Rotter, JI, Liu, Y, Shrader, P, Siscovick, DS, Tang, WH, Taylor, HA, Tracy, RP, Vasan, RS, Waters, KM, Wilks, R, Wilson, JG, Fabsitz, RR, Gabriel, SB, Kathiresan, S, Boerwinkle, E: Genome-wide association study of coronary heart disease and its risk factors in 8,090 African Americans: the NHLBI CARE Project. *PLoS Genet*, 7: e1001300, 2011.
37. Evans, MK, Lepkowski, JM, Powe, NR, LaVeist, T, Kuczmarski, MF, Zonderman, AB: Healthy aging in neighborhoods of diversity across the life span (HANDLS): overcoming barriers to implementing a longitudinal, epidemiologic, urban study of health, race, and socioeconomic status. *Ethn Dis*, 20: 267-275, 2010.
38. Adeyemo, A, Gerry, N, Chen, G, Herbert, A, Doumatey, A, Huang, H, Zhou, J, Lashley, K, Chen, Y, Christman, M, Rotimi, C: A genome-wide association study of hypertension and blood pressure in African Americans. *PLoS Genet*, 5: e1000564, 2009.
39. Chen, G, Bentley, A, Adeyemo, A, Shriner, D, Zhou, J, Doumatey, A, Huang, H, Ramos, E, Erdos, M, Gerry, N, Herbert, A, Christman, M, Rotimi, C: Genome-wide association study identifies novel loci association with fasting insulin and insulin resistance in African Americans. *Hum Mol Genet*, 21: 4530-4536, 2012.

40. Ramos, E, Chen, G, Shriner, D, Doumatey, A, Gerry, NP, Herbert, A, Huang, H, Zhou, J, Christman, MF, Adeyemo, A, Rotimi, C: Replication of genome-wide association studies (GWAS) loci for fasting plasma glucose in African-Americans. *Diabetologia*, 54: 783-788, 2011.
41. Lamanna, AC, Karbstein, K: Nob1 binds the single-stranded cleavage site D at the 3'-end of 18S rRNA with its PIN domain. *Proc Natl Acad Sci U S A*, 106: 14259-14264, 2009.
42. Zhou, J, Xu, T, Yan, Y, Qin, R, Wang, H, Zhang, X, Huang, Y, Wang, Y, Lu, Y, Fu, D, Chen, J: MicroRNA-326 functions as a tumor suppressor in glioma by targeting the Nin one binding protein (NOB1). *PLoS One*, 8: e68469, 2013.
43. Yang, S, Jin, T, Su, HX, Zhu, JH, Wang, DW, Zhu, SJ, Li, S, He, J, Chen, YH: The association between NQO1 Pro187Ser polymorphism and bladder cancer susceptibility: a meta-analysis of 15 studies. *PLoS One*, 10: e0116500, 2015.
44. Zhang, Y, Yang, D, Zhu, JH, Chen, MB, Shen, WX, He, J: The association between NQO1 Pro187Ser polymorphism and urinary system cancer susceptibility: a meta-analysis of 22 studies. *Cancer Invest*, 33: 39-40, 2015.
45. Chantry, A: WWP2 ubiquitin ligase and its isoforms: new biological insight and promising disease targets. *Cell Cycle*, 10: 2437-2439, 2011.
46. Byrne, A, McLaren, RP, Mason, P, Chai, L, Dufault, MR, Huang, Y, Liang, B, Gans, JD, Zhang, M, Carter, K, Gladysheva, TB, Teicher, BA, Biemann, HP, Booker, M, Goldberg, MA, Klinger, KW, Lillie, J, Madden, SL, Jiang, Y: Knockdown of human deubiquitinase PSMD14 induces cell cycle arrest and senescence. *Exp Cell Res*, 316: 258-271, 2010.
47. Deriziotis, P, O'Roak, BJ, Graham, SA, Estruch, SB, Dimitropoulou, D, Bernier, RA, Gerdtts, J, Shendure, J, Eichler, EE, Fisher, SE: De novo TBR1 mutations in sporadic autism disrupt protein functions. *Nature communications*, 5: 4954, 2014.
48. Vallon, V, Docherty, NG: Intestinal regulation of urinary sodium excretion and the pathophysiology of diabetic kidney disease: a focus on glucagon-like peptide 1 and dipeptidyl peptidase 4. *Exp Physiol*, 99: 1140-1145, 2014.
49. von Websky, K, Reichetzedder, C, Hocher, B: Physiology and pathophysiology of incretins in the kidney. *Curr Opin Nephrol Hypertens*, 23: 54-60, 2014.

## SUPPLEMENTARY FIGURE LEGENDS

**Supplementary Figure 1:** Stage 1 genome-wide association quantile-quantile (QQ) plot, with the minimum, maximum and median genomic inflation factor lambda of contributing studies.

**Supplementary Figure 2:** Stage 1 meta-analysis regional association plots of replicated loci. The red dotted line indicates the genome-wide significance threshold ( $p < 5 \times 10^{-8}$ ).

**Supplementary Figure 2a:** *NFAT5* locus in individuals of European descent (stage 1 GWAS meta-analysis results). The SNP rs7193778 is the SNP implicated by functional genomic annotation that is in near- perfect linkage disequilibrium with rs9980.

**Supplementary Figure 2b:** *SLC4A10* locus in individuals of European descent (stage 1 GWAS meta-analysis results).

**Supplementary Figure 3:** Relation of the *NFAT5* SNP rs7193778 to H3K27ac histone acetylation in 107 tissues and cell lines in the Roadmap Epigenome Project.

Tissues exhibiting the most closely related H3K27ac histone acetylation pattern over the depicted genomic interval in the vicinity of rs7193778 upstream of the *NFAT5* gene are shown toward the bottom of the figure in this clustered analysis from the ROADMAP EPIGENOME BROWSER v1.19 and the WashU Epigenome Browser v40.0.0 (<http://epigenomegateway.wustl.edu/browser/roadmap/>). The *NFAT5* super-enhancer region is depicted by clusters of H3K27ac markings (shown as darker blue bands) in the center of the genomic window. Approximately 10,000 bp of genomic sequence are shown. The SNP rs7193778 is located at the genomic position indicated by the red line.

**Supplementary Figure 4:** Predicted *NFAT5* consensus motif spanning the lead variant rs16846053 in *SLC4A10*. The JASPAR 2016 (<http://jaspar.genereg.net/>) resource was used to identify in unbiased fashion transcription factor binding sites in the vicinity of the lead variant, rs16846053. *Upper panel,*



graphical representation of the position-weight matrix for *NFAT5* in JASPAR 2016. Remarkably, the variant was found to affect an *NFAT5* consensus motif. Presence of the minor allele (lower case “g” ) reduces the JASPAR score, relative to the major allele (lower case “t”), for the motif (*Lower panel*).

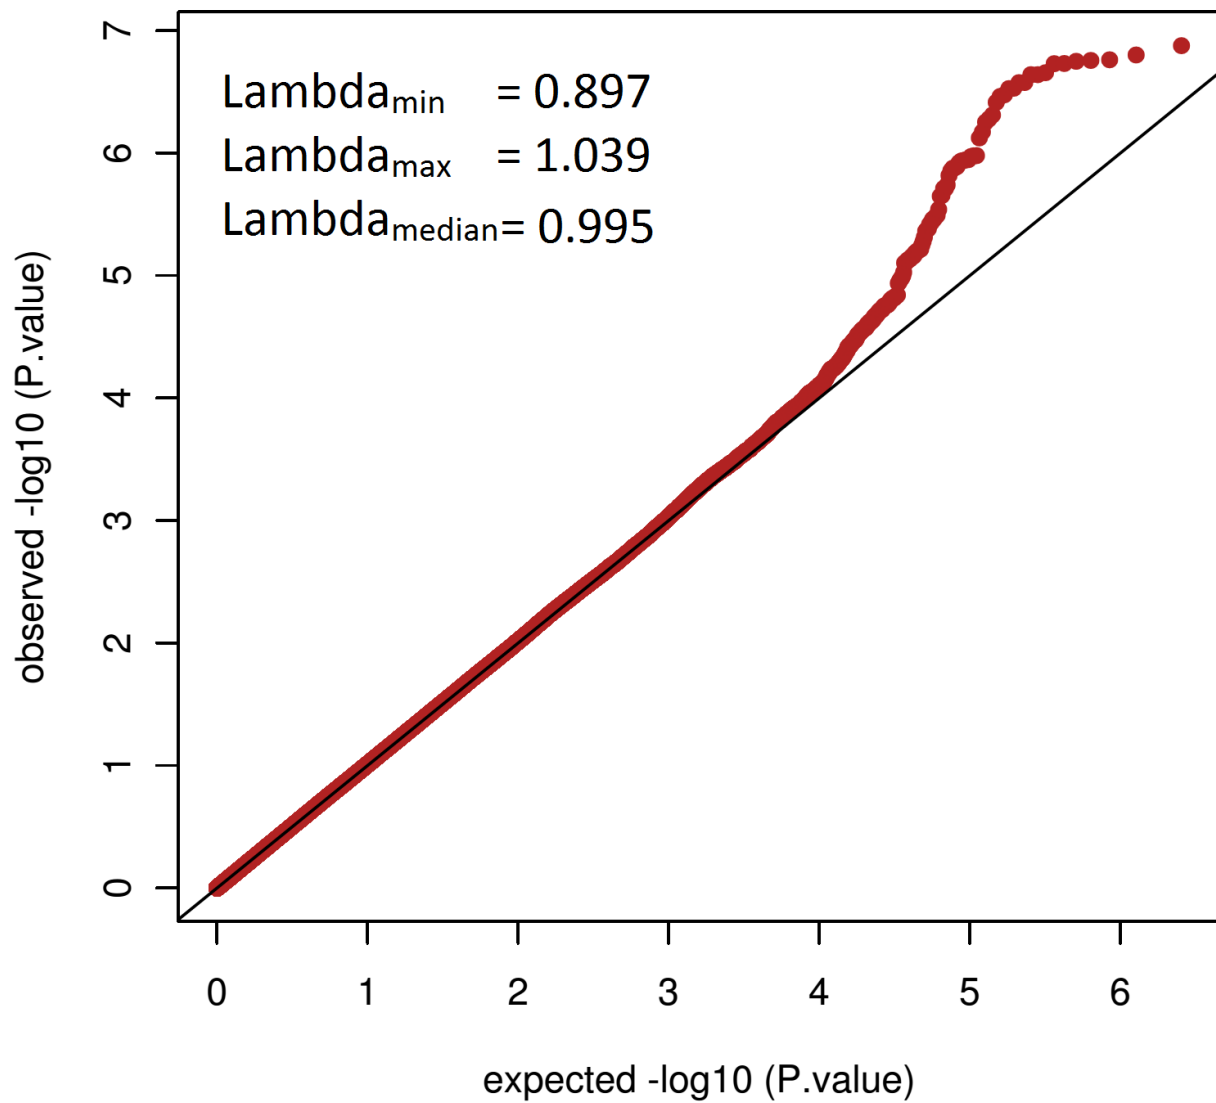

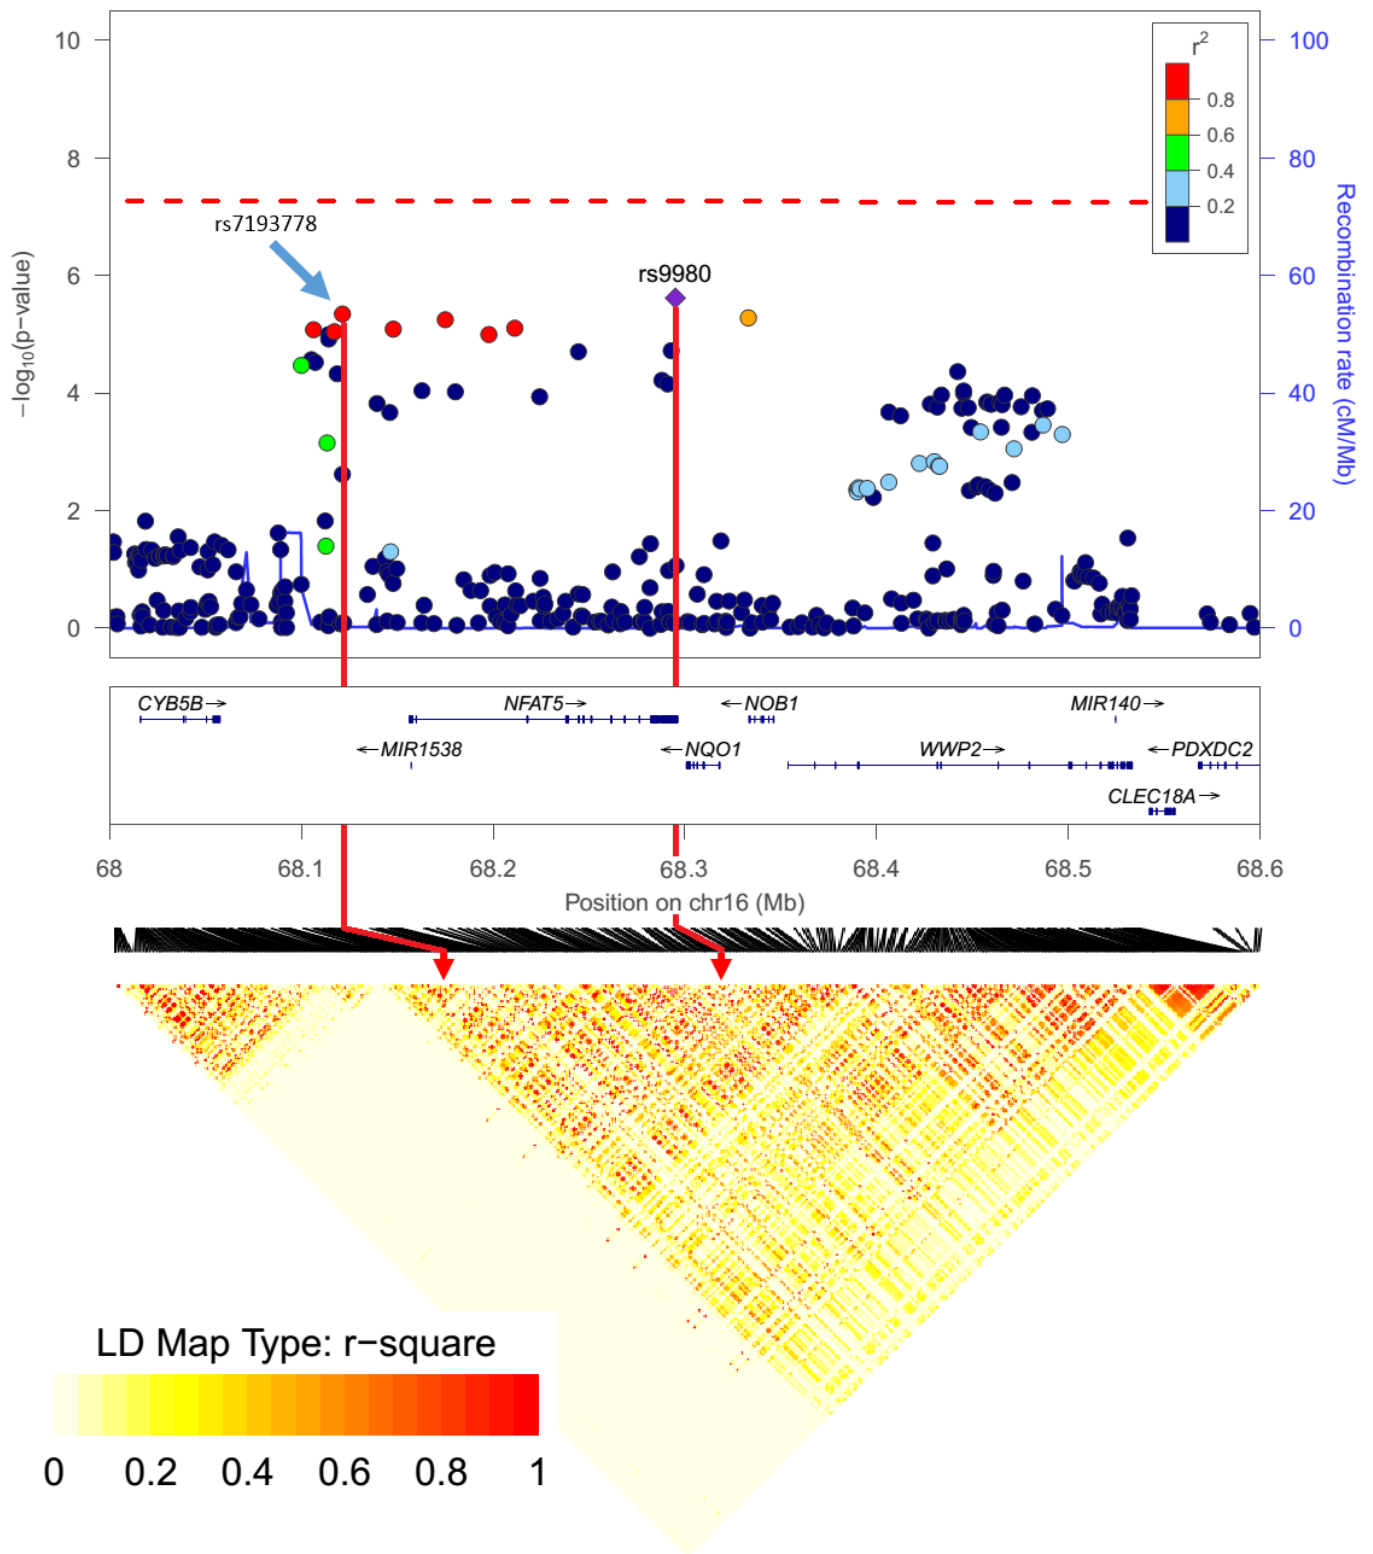

Supplementary Figure 2a

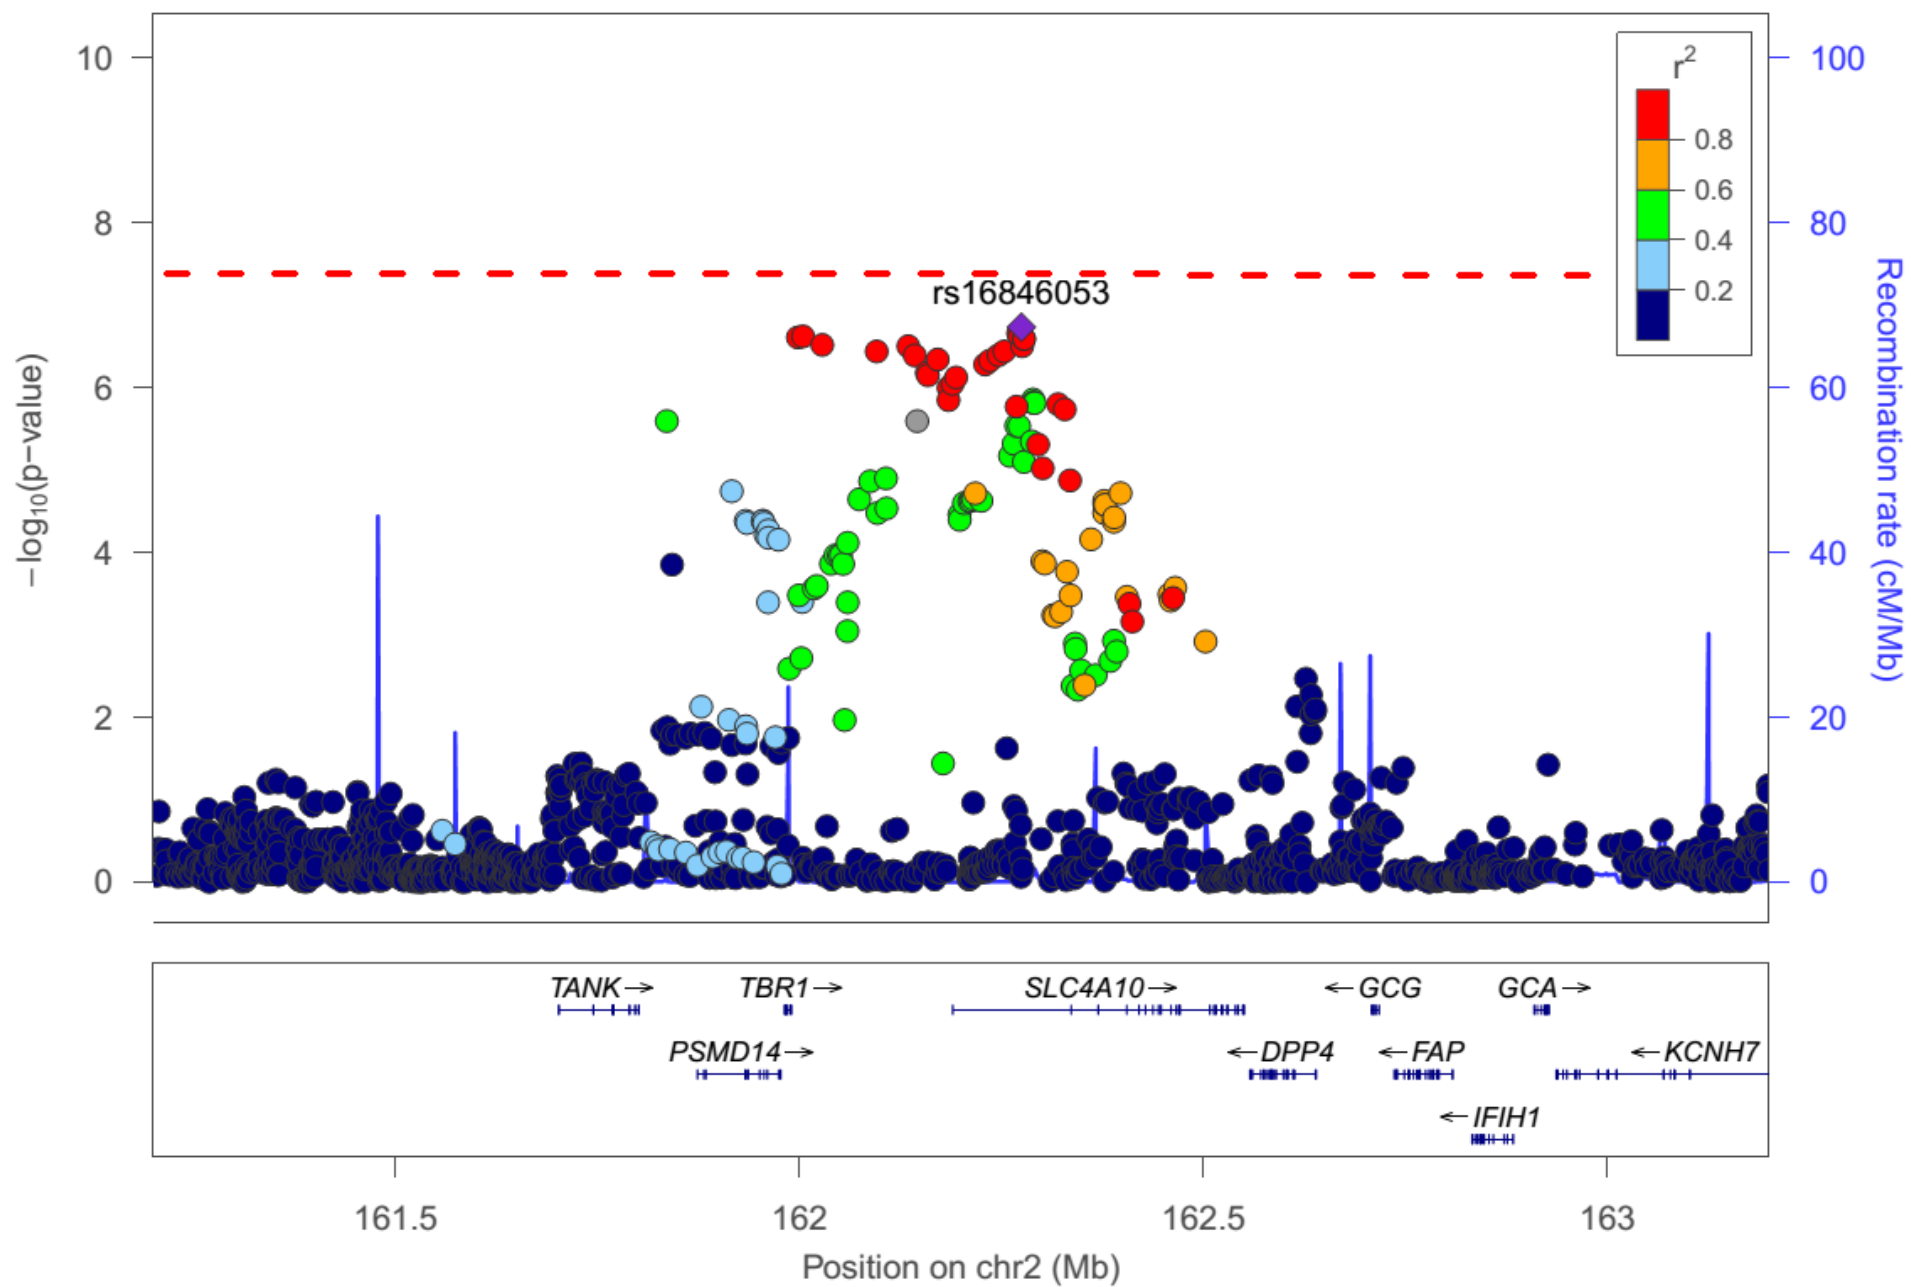

Supplementary Figure 2b

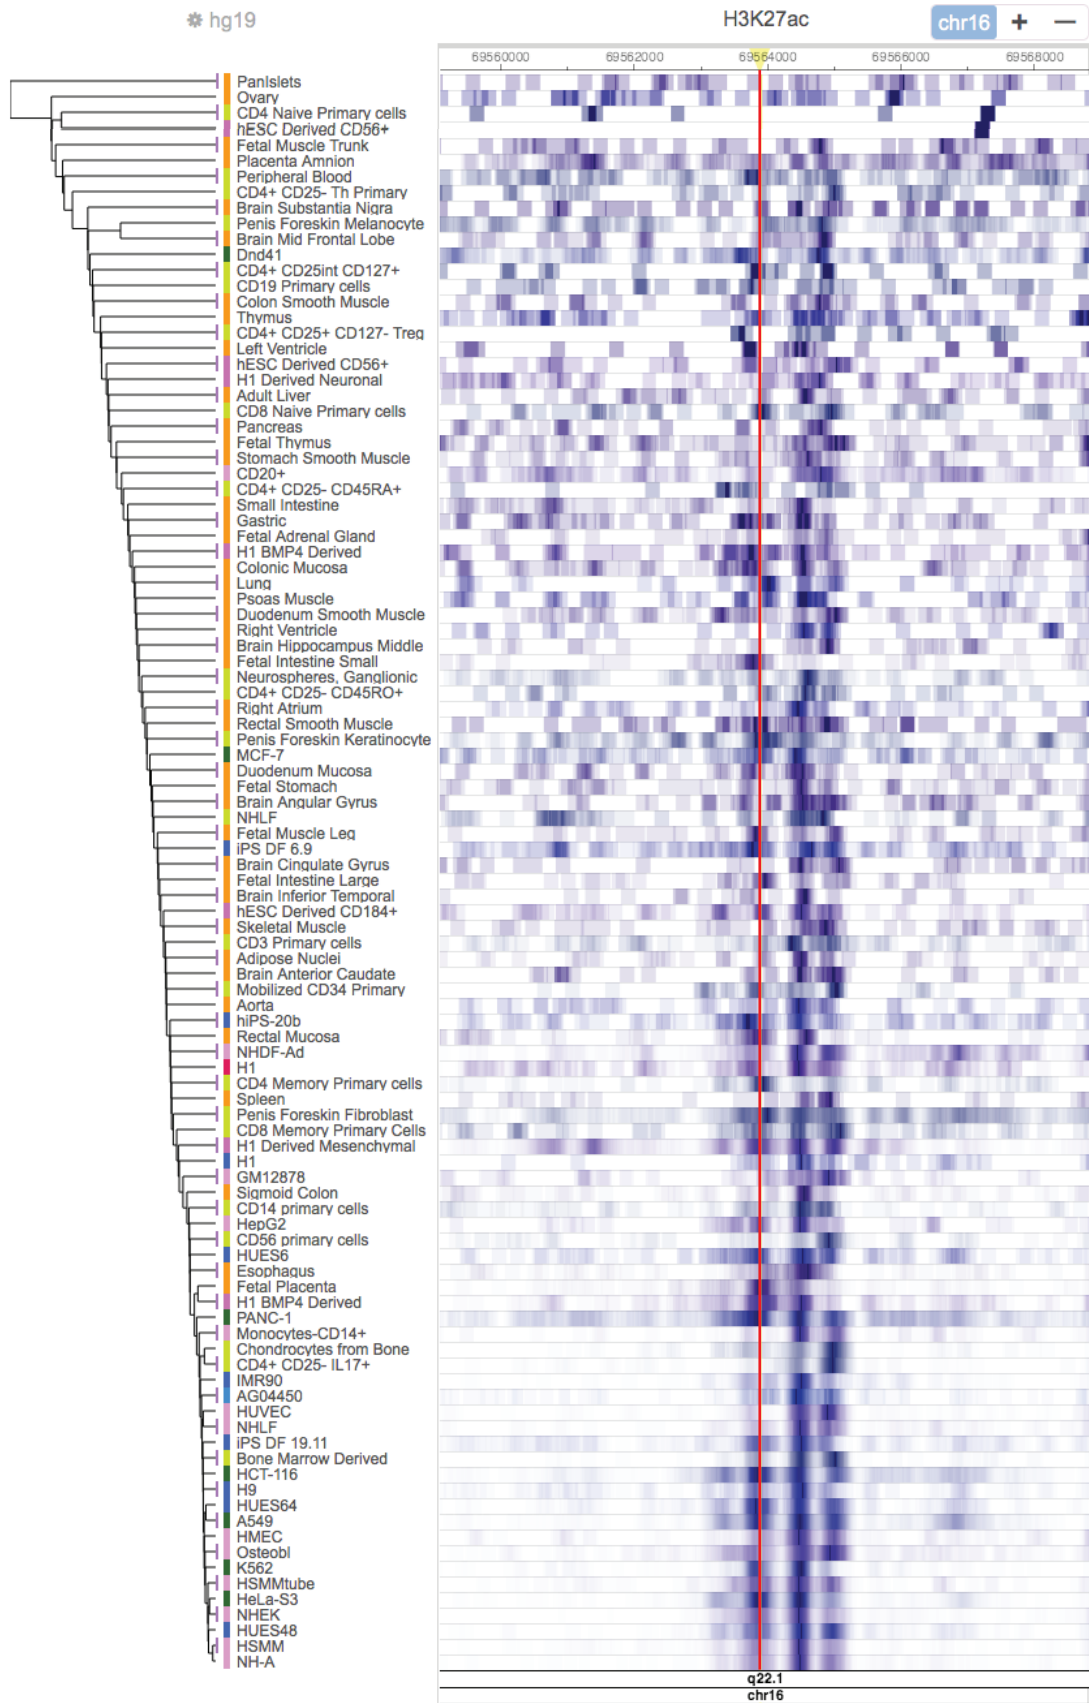

Supplementary Figure 3

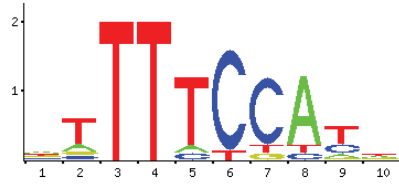

| Model ID | Model name | Score | Start | End | predicted site sequence         |
|----------|------------|-------|-------|-----|---------------------------------|
| MA0606.1 | NFAT5      | 8.942 | 140   | 149 | G T T T T C A C A <b>Major</b>  |
| MA0606.1 | NFAT5      | 6.166 | 140   | 149 | Gg T T T T C A C A <b>Minor</b> |
